# Supplementary material
Source: publisher figshare collection journal article supplement (https://wiley.figshare.com/articles/dataset/_/3563457)
Supplement: Supplementary file 1 [file 1]

## References

- Abdul Jamil Urfi, Thangarasu Meganathan, and Abdul Kalam. 2007. "Nesting Ecology of the Painted Stork *Mycteria Leucocephala* at Sultanpur National Park, Haryana, India." *Forktail* 23.
- Acharya, L. 1992. "Epomophorus Wahlbergi." *Mammalian Species* 394: 1–4.
- Ackermann, Rebecca R., James S. Brink, Savvas Vrahimis, and Bonita De Klerk. 2010. "Hybrid Wildebeest (*Artiodactyla: Bovidae*) Provide Further Evidence for Shared Signatures of Admixture in Mammalian Crania." *South African Journal of Science* 106 (11/12). Academy of Science of South Africa: 1–4.
- Adkisson, C.S. 1999. "Pine Grosbeak (*Pinicola Enucleator*)." In *The Birds of North America Online*, edited by A. Poole.
- Ahrestani, Farshid S., Frank Van Langevelde, Ignas M. A. Heitkönig, and Herbert H. T. Prins. 2012. "Contrasting Timing of Parturition of Chital Axis Axis and Gaur Bos Gaurus in Tropical South India - the Role of Body Mass and Seasonal Forage Quality." *Oikos* 121 (8): 1300–1310.
- Ainul Hussain, Syed. 1999. "Reproductive Success, Hatchling Survival and Rate of Increase of Gharial *Gavialis Gangeticus* in National Chambal Sanctuary, India." *Biological Conservation* 87 (2): 261–68.
- Alderman, Rachael Louise. 2012. "The Shy Albatross (*Thalassarche Cauta*): Population Trends, Environmental and Anthropogenic Drivers, and the Future for Management and Conservation". University of Tasmania.
- Alderton, D. 1991. *Crocodiles and Alligators of the World*.
- Alho, C.J.R., and L.F.M. Padua. 1982. "Reproductive Parameters and Nesting Behavior of the Amazon Turtle *Podocnemis Expansa* (*Testudinata: Pelomedusidae*) in Brazil." *Canadian Journal of Zoology* 60: 97–103.
- Allen, B.M., R.L. Brownell, and J.G. Mead. 2011. "Species Review of Cuvier's Beaked Whale, *Ziphius Cavirostris*". SC/63/SM17.
- Alonso, Juan C., Marina Magaña, Javier A. Alonso, Carlos Palacín, Carlos A. Martín, and Beatriz Martín. 2009. "The Most Extreme Sexual Size Dimorphism among Birds: Allometry, Selection, and Early Juvenile Development in the Great Bustard (*Otis Tarda*)." *The Auk* 126 (3). The American Ornithologists' Union: 657–65.
- Alvarez-Castaneda, S.T. 2001. "Peromyscus Sejugis." *Mammalian Species* 658: 1–2.
- . 2002. "Peromyscus Hooperi." *Mammalian Species* 709: 1–3.
- . 2005. "Peromyscus Melanotis." *Mammalian Species* 764: 1–4.
- Alvarez-Castaneda, S.T., and P. Cortes-Calva. 2003. "Peromyscus Eva." *Mammalian Species* 738: 1–3.

- Alvarez-Castaneda, S.T., and N. Gonzalez-Ruiz. 2009. "Peromyscus Levipes." *Mammalian Species* 824: 1–6.
- Ambrose, Shan Taryn. 2010. "Feeding Ecology and Diet Shift of Long-Beaked Common Dolphins *Delphinus Capensis* (Gray 1828) Incidentally Caught in Anti-Shark Nets off Kwazulu-Natal, South Africa". Rhodes University.
- Ancel, André, Michaël Beaulieu, and Caroline Gilbert. 2013. "The Different Breeding Strategies of Penguins: A Review." *Comptes Rendus Biologies* 336 (1): 1–12.
- Anderson, Sydney. 1969. "Macrotus Waterhousii." *Mammalian Species* 1: 1–4.
- Anderson, Tim J.C., Andrew J. Berry, J. Nevil Amos, and James M. Cook. 1988. "Spool-and-Line Tracking of the New Guinea Spiny Bandicoot, *Echymipera Kalubu* (Marsupialia, Peramelidae)." *Journal of Mammalogy* 69 (1): 114–20.
- Antelo, Rafael, José Ayarzagüena, and Javier Castroviejo. 2010. "Reproductive Ecology of Orinoco Crocodiles (*Crocodylus Intermedius*) in a Newly Established Population at El Frío Biological Station, Venezuela." *British Herpetological Society* 20 (1). British Herpetological Society: 51–58.
- April Hedd, Douglas F. Bertram, John L. Ryder, and Ian L. Jones. 2006. "Effects of Interdecadal Climate Variability on Marine Trophic Interactions: Rhinoceros Auklets and Their Fish Prey." *Marine Ecology Progress Series* 309 (March): 263–78.
- Araujo, Marcio S., Eduardo G. Martins, Leonardo D. Cruz, Fernanda R. Fernandes, Aricio X. Linhares, Sergio F. dos Reis, and Paulo R. Jr. Guimaraes. 2010. "Nested Diets: A Novel Pattern of Individual-Level Resource Use." *Oikos* 119: 81–88.
- Archer, M. G., and R. C Taylor. 2009. "Fledging Weights of Atlantic Puffins *Fratercula Arctica* on Sule Skerry, Scotland, with Reference to a Relatively Poor Season in 2005." *Seabird* 22: 1–8.
- Armstrong, D.M., and J.K. Jones. 1971. "Sorex Merriami." *Mammalian Species* 2: 1–2.
- . 1972. "Megasorex Gigas." *Mammalian Species* 16: 1–2.
- Ascher, J. S., and J. Pickering. 2014. "Discover Life Bee Species Guide and World Checklist (Hymenoptera: Apoidea: Anthophila)." <http://www.discoverlife.org/mp/20q?search=Trochilidae&flags=col3:&res=320>.
- Astley, Henry C, and Bruce C Jayne. 2009. "Arboreal Habitat Structure Affects the Performance and Modes of Locomotion of Corn Snakes (*Elaphe Guttata*)." *Journal of Experimental Zoology. Part A, Ecological Genetics and Physiology* 311 (3): 207–16.
- Atanasov, A. 2012a. "Allometric Scaling of Total Metabolic Energy per Lifespan in Living Organisms." *Trakia Journal of Sciences* 10 (3): 1–14.

- . 2012b. "Scaling of Biological Space and Time: Volume to Surface Ratio in Living Organisms Is Proportional to Lifespan." *Trakia Journal of Sciences* 10 (2): 36–47.
- Atramentowicz, M. 1992. "Optimal Litter Size: Does It Cost More to Raise a Larger Litter in *Caluromys Philander*?" *Canadian Journal of Zoology* 70: 1511–15.
- Aubret, Fabien. 2013. "Heart Rates Increase after Hatching in Two Species of Natricine Snakes." *Scientific Reports* 3: 3384.
- Aubret, Fabien, Xavier Bonnet, Richard Shine, and Stephanie Maumelat. 2003. "Clutch Size Manipulation, Hatching Success and Offspring Phenotype in the Ball Python (*Python Regius*)." *Biological Journal of the Linnean Society* 78 (2): 263–72.
- Audet, A.M., C.B. Robbins, and S. Lariviere. 2002. "Alopex Lagopus." *Mammalian Species* 713: 1–10.
- Auffenberg, W. 1981. *The Behavioral Ecology of the Komodo Monitor*. University Press of Florida.
- . 1994. *The Bengal Monitor*. First Edit. University Press of Florida.
- Auliya, Mark. 2010. "Conservation Status and Impact of Trade on the Oriental Rat Snake *Ptyas Mucosa* in Java, Indonesia". Petaling Jaya, Selangor, Malaysia.
- Austad, Steven N. 2011. "Candidate Bird Species for Use in Aging Research." *ILAR Journal / National Research Council, Institute of Laboratory Animal Resources* 52 (1): 89–96.
- Avaria-Llautureo, Jorge, Cristián E Hernández, Dusan Boric-Bargetto, Cristian B Canales-Aguirre, Bryan Morales-Pallero, and Enrique Rodríguez-Serrano. 2012. "Body Size Evolution in Extant Oryzomyini Rodents: Cope's Rule or Miniaturization?" Edited by Nicolas Salamin. *PloS One* 7 (4). Public Library of Science: e34654. doi:10.1371/journal.pone.0034654.
- Baard, E. H. W. 1995. "Growth, Age at Maturity and Sexual Dimorphism in the Geometric Tortoise, *Psammobates Geometricus*." *The Journal of the Herpetological Association of Africa* 44 (1). Taylor & Francis: 10–15.
- Baker, Gillian C., and René W.R.J. Dekker. 2008. "Lunar Synchrony in the Reproduction of the Moluccan Megapode *Megapodius Wallacei*." *Ibis* 142 (3): 382–88.
- Baker, R.J., and C.L. Clark. 1987. "Uroderma Bilobatum." *Mammalian Species* 279: 1–4.
- Balakrishnan, P. 2010. "Breeding Biology of the Hill Swallow *Hirundo Domicola* in Western Ghats, India." *Journal of the Bombay Natural History Society* 107 (2): 109–15.
- Ballouard, Jean-Marie, Pauline Priol, Jean Oison, Alexandre Ciliberti, and Antoine Cadi. 2010. "Does Reintroduction Stabilize the Population of the Critically Endangered Gharial (*Gavialis Gangeticus*, Gavialidae) in Chitwan National Park, Nepal?" *Aquatic Conservation: Marine and Freshwater Ecosystems* 20 (7): 756–61.

- Banack, S.A. 2001. "Pteropus Samoensis." *Mammalian Species* 661: 1–4.
- Banzato, Tommaso, Paolo Selleri, Irene A Veladiano, Andrea Martin, Emanuele Zanetti, and Alessandro Zotti. 2012. "Comparative Evaluation of the Cadaveric, Radiographic and Computed Tomographic Anatomy of the Heads of Green Iguana (*Iguana Iguana*), Common Tegu (*Tupinambis Merianae*) and Bearded Dragon (*Pogona Vitticeps*)." *BMC Veterinary Research* 8 (1): 53.
- Barboza, Noelia Nazaret, Norma Beatriz Mussart, Gabriela Alejandra Koza, and Jose Antonio Coppo. 2012. "Medio Interno En Ejemplares Juveniles de Caiman Latirostris Y Caiman Yacare de Argentina. Variaciones Fisiologicas Segun Especie, Sexo, Peso, Tamano Y Estacion Del Ano." *Revista Electronica de Veterinaria* 13 (3): 1–20.
- Barclay, Robert MR, James H Fullard, and David S Jacobs. 1999. "Variation in the Echolocation Calls of the Hoary Bat (*Lasiurus Cinereus*): Influence of Body Size, Habitat Structure, and Geographic Location." *Canadian Journal of Zoology* 77 (4). NRC Research Press Ottawa, Canada: 530–34.
- Barlow, Maida L., and John E. Dowding. 2002. "Breeding Biology of Caspian Terns (*Sterna Caspia*) at a Colony near Invercargill, New Zealand." *Notornis* 49: 76–90.
- Barnett, A.A. 2005. "Cacajao Melanocephalus." *Mammalian Species*.
- Barnett, Brian. 1999. "Keeping and Breeding the Coastal Taipan (*Oxyuranus Scutellatus*)." *Monitor - Journal of the Victorian Herpetological Society* 10 (2/3): 38–45.
- Barnhill, Rose Ann, Dora Weyer, W. Ford Young, Kimberly G. Smith, and Douglas A. James. 2005. "Breeding Biology of Jabirus (*Jabirus Mycteria*) in Belize." *The Wilson Bulletin* 117 (2). The Wilson Ornithological Society: 142–53.
- Barnier, Florian, Sophie Grange, Andre Ganswindt, Hlengisizwe Ncube, and Patrick Duncan. 2012. "Inter-Birth Interval in Zebras Is Longer Following the Birth of Male Foals than after Female Foals." *Acta Oecologica* 42 (July): 11–15.
- Barreto, G.R., and S. Garcia-Rangel. 2005. "Holochilus Sciureus." *Mammalian Species* 780: 1–5.
- Barros, Tito, Magddy Jiménez-oraá, Heide J Heredia, and Andrés E Seijas. 2010. "Artificial Incubation of Wild-Collected Eggs of American and Orinoco Crocodiles (*Crocodylus Acutus* and *C. Intermedius*), Guárico and Zulia, Venezuela." *Conservation Evidence* 7: 111–15.
- Barry, R.E., and J. Shoshani. 2000. "Heterohyrax Brucei." *Mammalian Species* 645: 1–7.
- Barshep, Yahkat. 2011. "Migration and Moults Strategy of the Curlew Sandpiper". UNIVERSITY OF CAPE TOWN.
- Bartholomew, George A., William R. Dawson, and Robert C. Lasiewski. 1970. "Thermoregulation and Heterothermy in Some of the Smaller Flying Foxes (*Megachiroptera*) of New Guinea." *Zeitschrift Fur Vergleichende Physiologie* 70: 196–209.

- Bartlett, Patricia Pope, and Ernie Wagner. 1997. *Pythons: Everything about Selection, Care, Nutrition, Diseases, Breeding, and Behavior*. Barron's Educational Series.
- Batistella, Alexandre Milaré, and Richard C. Vogt. 2008. "Nesting Ecology of *Podocnemis Erythrocephala* (Testudines, Podocnemididae) of the Rio Negro, Amazonas, Brazil." *Chelonian Conservation and Biology* 7 (1). Chelonian Research Foundation: 12–20.
- Beasley, Isabel, Yves Cherel, Sue Robinson, Emma Betty, and Rosemary Gales. 2013. "Pygmy Sperm Whale (*Kogia Breviceps*) Stranding Record in Tasmania, Australia, and Diet of a Single Specimen." *Papers and Proceedings of the Royal Society of Tasmania* 147: 25–32.
- Beck, Daniel. 2010. "Petition to List the Utah Population of the Gila Monster (*Heloderma Suspectum*) under the U.S. Endangered Species Act."
- Becker, Peter H., and Michael Wink. 2003. "Influences of Sex, Sex Composition of Brood and Hatching Order on Mass Growth in Common Terns *Sterna Hirundo*." *Behavioral Ecology and Sociobiology* 54 (2). Springer-Verlag: 136–46.
- Bedford, Gavin S., and Keith A. Christian. 2001. "Metabolic Response to Feeding and Fasting in the Water Python (*Liasis Fuscus*)." *Australian Journal of Zoology* 49 (4). CSIRO PUBLISHING: 379–87.
- Behler, J.L., and F.W. King. 1979. *The Audubon Society Field Guide to North America*.
- Belcher, R.L., and Jr. T.E. Lee. 2002. "Arctocephalus Townsendii." *Mammalian Species* 700: 1–5.
- Bell, Gary P., and M. Brock Fenton. 1986. "Visual Acuity, Sensitivity and Binocularity in a Gleaning Insectivorous Bat, *Macrotus Californicus* (Chiroptera: Phyllostomidae)." *Animal Behaviour* 34 (2): 409–14.
- Bennett, N.C., C.G. Faulkes, L. Hart, and J.U.M. Jarvis. 2009. "Bathyergus Suillus." *Mammalian Species* 828: 1–7.
- Berry, James F., and John B. Iverson. 2011. "Kinosternon Scorpioides (Linnaeus 1766) - Scorpion Mud Turtle." In *Conservation Biology of Freshwater Turtles and Tortoises: A Compilation Project of the IUCN/SSC Tortoise and Freshwater Turtle Specialist Group*, 063.1–063.15.
- Best, T.L., and G. Ceballos. 1995. "Spermophilus Perotensis." *Mammalian Species* 507: 1–3.
- Best, T.L., J.L. Hunt, L.A. McWilliams, and K.G. Smith. 2002. "Eumops Auripendulus." *Mammalian Species* 708: 1–5.
- Best, Troy I., W. Mark Kiser, and Patricia W. Freeman. 1996. "Eumops Perotis." *Mammalogy Papers*, no. 534: 8.
- Bezuijen, M.R., B.M. Shwedick, R. Sommerlad, C. Stevenson, and R.B. Steubing. 2010. "Tomistoma Tomistoma Schlegelii." In *Crocodiles. Status Survey and Conservation Action Plan*, edited by S.C. Manolis and C. Stevenson, Third Edit, 133–38. Darwin: Crocodile Specialist Group.

- Bezuijen, Mark R., Jack H. Jr. Cox, John B. Thorbjarnarson, Chanthone Phothitay, Michael Hedemark, and Akchousanh Rasphone. 2013. "Status of Siamese Crocodile (*Crocodylus Siamensis*) Schneider, 1801 (Reptilia: Crocodylia) in Laos." *Journal of Herpetology* 47 (1): 41–65.
- Bhola, Nina, Joseph O. Ogutu, Hans-Peter Piepho, Mohamed Y. Said, Robin S. Reid, N. Thompson Hobbs, and Han Olf. 2012. "Comparative Changes in Density and Demography of Large Herbivores in the Masai Mara Reserve and Its Surrounding Human-Dominated Pastoral Ranches in Kenya." *Biodiversity and Conservation* 21 (6): 1509–30.
- Birchard, G. F., and D. Marcellini. 1996. "Incubation Time in Reptilian Eggs." *Journal of Zoology, London* 240 (4). Wiley Online Library: 621–35.
- Blake, Stephen, Martin Wikelski, Fredy Cabrera, Anne Guezou, Miriam Silva, E. Sadeghayobi, Charles B. Yackulic, and Patricia Jaramillo. 2012. "Seed Dispersal by Galapagos Tortoises." *Journal of Biogeography* 39 (11): 1961–72.
- Bleich, V.C. 1977. "Dipodomys Stephensi." *Mammalian Species* 73: 1–3.
- Bloch, Dorete, Genevieve Desportes, Paul Harvey, Christina Lockyer, and Bjarni Mikkelsen. 2012. "Life History of Risso's Dolphin (*Grampus Griseus*) (G. Cuvier, 1812) in Teh Faroe Islands." *Aquatic Mammals* 38 (3): 250–66.
- Boback, Scott M., and Craig Guyer. 2003. "EMPIRICAL EVIDENCE FOR AN OPTIMAL BODY SIZE IN SNAKES." *Evolution* 57 (2): 345–451. doi:10.1111/j.0014-3820.2003.tb00268.x.
- Bonaccorso, Frank J., John R. Winkelmann, and Deanna G. P. Byrnes. 2005. "Home Range, Territoriality, and Flight Time Budgets in the Black-Bellied Fruit Bat, *Melonycteris Melanops* (Pteropodidae)." *Journal of Mammalogy* 86 (5): 931–36.
- Bond, Alexander L., Ian L. Jones, Sampath Seneviratne, and Sabir Bin Muzaffar. 2013. "Least Auklet (*Aethia Pusilla*)." In *The Birds of North America Online*, edited by A. Poole.
- Bonin, Franck, Bernard Devaux, and Alain Dupre. 2006. *Turtles of the World*. JHU Press.
- Bonnevie, Bo T., Maëlle Connan, and Christopher D. Mcquaid. 2012. "Effects of Re-Breeding Rates on Population Size Estimation of Biennial Breeders: Results from a Model Based on Albatrosses." Edited by LORIEN PICHEGRU. *Ibis* 154 (3): 499–507. doi:10.1111/j.1474-919X.2012.01247.x.
- Bonnici, Micah. 2010. "The Blue-Tongued Lizards of Westerfolds Park." *Electronic Journal of the Victorian Herpetological Society* 5: 8–9.
- Booth, Warren, Charles F Smith, Pamela H Eskridge, Shannon K Hoss, Joseph R Mendelson, and Gordon W Schuett. 2012. "Facultative Parthenogenesis Discovered in Wild Vertebrates." *Biology Letters* 8 (6): 983–85.

- Borges Costa, Ana Paula, and Paulo Cesar Simoes-Lopes. 2012. "Physical Maturity of the Vertebral Column of *Tursiops Truncatus* (Cetacea) from Southern Brazil." *Neotropical Biology and Conservation* 7 (1): 2–7.
- Borissenko, Alex V., and Sergei V. Krusko. 2003. "Bats of Vietnam and Adjacent Territories: An Identification Manual". Moscow.
- Bouchard, S. 2001. "Chaerephon Ansorgei." *Mammalian Species* 660: 1–3.
- Boustead, Anna. 2009. "A Review of the Potential Impacts of Climate Change upon Kakadu Wetlands". Charles Darwin University.
- Bowler, J.K. 1975. "Longevity of Reptiles and Amphibians in N. American Collections as of 1 November, 1975." *Society for the Study of Amphibians and Reptiles, Miscellaneous Publications, Herpetological Circular* 6: 1–32.
- Boyer, Alison G., Jean-Luc E. Cartron, and James H. Brown. 2009. "Interspecific Pairwise Relationships among Body Size, Clutch Size and Latitude: Deconstructing a Macroecological Triangle in Birds." *Journal of Biogeography* 37 (1): 47–56. doi:10.1111/j.1365-2699.2009.02175.x.
- Bradshaw, SD, KD Morris, CR Dickman, PC Withers, and D Murphy. 1994. "Field Metabolism and Turnover in the Golden Bandicoot (*Isodon-Auratus*) and Other Small Mammals From Barrow Island, Western-Australia." *Australian Journal of Zoology* 42 (1). CSIRO PUBLISHING: 29.
- Branch, William R. 1998. *Field Guide to Snakes and Other Reptiles of Southern Africa*. Struik.
- Branco, Joaquim Olinto, Hélio Augusto, Alves Fracasso, Edison Barbieri, Santa Catarina, Brasil E-mail, Universidade Federal, et al. 2009. "Breeding Biology of the Kelp Gull (*Larus Dominicanus*) at Santa Catarina Coast, Brazil", no. Sick 1997: 409–19.
- Braun, J.K., Q.D. Layman, and M.A. Mares. 2009. "Myotis Albescens." *Mammalian Species* 846: 1–9.
- Braun, Janet K., Nathan L. Pratt, and Michael A. Mares. 2010. "Thylamys Pallidior (Didelphimorphia: Didelphidae)." *Mammalian Species* 42 (856): 90–98.
- Brazaitis, Peter, and Myrna Watanabe. 2011. "Crocodilian Behaviour: A Window to Dinosaur Behaviour?" *Historical Biology* 23 (1): 73–90.
- Brazil, Mark. 2010. *The Whooper Swan*. A&C Black.
- Brennan, Patricia L. R. 2010. "Clutch Predation in Great Tinamous *Tinamus Major* and Implications for the Evolution of Egg Color." *Journal of Avian Biology* 41 (4): 419–26.
- Broadley, Donald G., and Walter Sachsse. 2011. "Cycloderma Frenatum Peters 1854 - Zambezi Flapshell Turtle, Nkhasi." In *Conservation Biology of Freshwater Turtles and Tortoises: A Compilation Project of the IUCN/SSC Tortoise and Freshwater Turtle Specialist Group*, 055.1–055.5.

- Brock, Patrick M. 2012. "Immunity, Life History and Conservation in the Galapagos Sea Lion". University of Leeds.
- Brockmann, Thomas, Michael Hoffmann, and Eva Ziemssen. 2013. "Erfahrungsbericht Über Die Haltung Und Deutsche Erstzucht Der Borneo-Flussschildkröte (*Orlitia borneensis* Gray, 1873) Im Zoo Dresden." *Der Zoologische Garten* 82 (1-2): 8–25.
- Bromage, Timothy G., Rodrigo S. Lacruz, Russell Hogg, Haviva M. Goldman, Shannon C. McFarlin, Johanna Warshaw, Wendy Dirks, et al. 2009. "Lamellar Bone Is an Incremental Tissue Reconciling Enamel Rhythms, Body Size, and Organismal Life History." *Calcified Tissue International* 84 (5): 388–404.
- Brown, Patricia. 2002. "West Mojave Plan: Species Accounts (*Eumops perotis*)". Bishop, CA.
- Brown, William Y. 1977. "Temporal Patterns in Laying, Hatching and Incubation of Sooty Terns and Brown Noddies." *The Condor* 79 (1): 133–36.
- Brunet-Rossini, Anja K., and Steven N. Austad. 2004. "Ageing Studies on Bats: A Review." *Biogerontology* 5: 211–22.
- Brush, T. 1998. "Olive Sparrow (*Arremonops rufivirgatus*)." In *The Birds of North America Online*, edited by A. Poole.
- Bryan, T. Scott, and Betty Tucker-Bryan. 2009. *The Explorer's Guide to Death Valley National Park*. University Press of Colorado.
- Bucher, J.E., and R.S. Hoffmann. 1980. "Caluromys derbianus." *Mammalian Species* 140: 1–4.
- Buckley, Lauren B. 2010. "The Range Implications of Lizard Traits in Changing Environments." *Global Ecology and Biogeography* 19: 452–64.
- Bump, Gardiner, and Janet W. Bump. 1969. "A Study of the Spotted Tinamous and the Pale Spotted Tinamous of Argentina". U.S. Fish and Wildlife Service.
- Burger, Claudia, Eugen Belskii, Tapio Eeva, Toni Laaksonen, Marko Mägi, Raivo Mänd, Anna Qvarnström, et al. 2012. "Climate Change, Breeding Date and Nestling Diet: How Temperature Differentially Affects Seasonal Changes in Pied Flycatcher Diet Depending on Habitat Variation." *The Journal of Animal Ecology* 81 (4): 926–36.
- Burger, J. 1996. "Laughing Gull (*Leucophaeus atricilla*)." In *The Birds of North America Online*, edited by A. Poole.
- Burghardt, Gordon M., Austin Stanley Rand, and (Eds.). 1982. *Iguanas of the World: Their Behavior, Ecology, and Conservation*. Edited by Gordon M. Burghardt and Austin Stanley Rand. Noyes Publications.



- Burgos, Álvaro Garitano-Zavala. 2003. "Proyectos Demostrativos de Crianza de Pisacca (Nothoprocta Ornata) En Bolivia."
- Burnett, S.E., J.B. Jennings, J.C. Rainey, and T.L. Best. 2001. "Molossus Bondae." *Mammalian Species* 666: 1–3.
- Burns, John M., and Ronald G. Easley. 1977. "Hormonal Control of Delayed Development in the California Leaf-Nosed Bat, *Macrotus Californicus*." *General and Comparative Endocrinology* 32 (2): 163–66.
- Burt, William Henry. 1980. *A Field Guide to the Mammals: North America North of Mexico*. Houghton Mifflin Harcourt.
- Buskirk, James R., and Paulino Ponce-Campos. 2011. "Terrapene Nelsoni Stejneger 1925 - Spotted Box Turtle, Tortuga de Chispitas, Tortuga de Monte." In *Conservation Biology of Freshwater Turtles and Tortoises: A Compilation Project of the IUCN/SSC Tortoise and Freshwater Turtle Specialist Group*, 060.1–060.9.
- Buss, David M., Patricia H. Hawley, and (Eds.). 2010. *The Evolution of Personality and Individual Differences*. Edited by David M. Buss and Patricia H. Hawley. Oxford University Press.
- Bustard, H. Robert. 1971. "A Population Study of the Eyed Gecko, *Oedura Ocellata* Boulenger, in Northern New South Wales, Australia." *Copeia* 1971 (4): 658–69.
- Byrd, G. V., J. C. Williams., and J. C. Williams. 1993. "Whiskered Auklet (*Aethia Pygmaea*)," In *The Birds of North America Online*, edited by A. Poole.
- Caceres, M.C., and R.M.R. Barclay. 2000. "Myotis Septentrionalis." *Mammalian Species* 634: 1–4.
- Caceres, N.C., and A.P. Carmignotto. 2006. "Caluromys Lanatus." *Mammalian Species* 803: 6.
- Cáceres, Nilton C. 2005. "Comparative Lengths of Digestive Tracts of Seven Didelphid Marsupials (Mammalia) in Relation to Diet." *Revista Brasileira de Zoologia* 22 (1). Sociedade Brasileira de Zoologia: 181–85.
- Caceres, Nilton C., Rodrigo P. Napoli, and Wellington Hannibal. 2011. "Differential Trapping Success for Small Mammals Using Pitfall and Standard Cage Traps in a Woodland Savannah Region of Southwestern Brazil." *Mammalia* 75: 45–52.
- Caceres, Nilton C., Rodrigo P. Napoli, Wellington H. Lopes, Janaina Casella, and Gilberto S. Gazeta. 2007. "Natural History of the Marsupial *Thylamys Macrurus* (Mammalia, Didelphidae) in Fragments of Savannah in Southwestern Brazil." *Journal of Natural History* 41 (29-32): 1979–88.
- Cain, J.W., P.R. Krausman, and H.L. Germaine. 2004. "Antidorcas Marsupialis." *Mammalian Species* 753: 1–7.

- Calabuig, Cecilia Perez, Andy J. Green, Miguel Ferrer, Roberto Muriel, and Heden Moreira. 2011. "Sexual Size Dimorphism and Sex Determination by Morphometric Measurements in the Coscoroba Swan." *Studies on Neotropical Fauna and Environment* 46 (3). Taylor & Francis: 177–84.
- Calder, W.A. III. 1979. "The Kiwi and Egg Design: Evolution as a Package Deal." *Bioscience* 29: 461–67.
- Calver, M.C., D.R. King, J.L. Gardner, and G.R. Martin. 1991. "Total Food Consumption of Some Native Australian Small Mammals in the Laboratory." *Australian Mammalogy* 14 (2): 139–42.
- Campos, C., R. Ojeda, S. Monge, and M. Dacar. 2001. "Utilization of Food Resources by Small and Medium-Sized Mammals in the Monte Desert Biome, Argentina." *Austral Ecology* 26 (2): 142–49.
- Campos, C.M., M.F. Tognelli, and R.A. Ojeda. 2001. "Dolichotis Patagonum." *Mammalian Species* 652: 1–5.
- Carey, C., H. Rahn, and P. Parisi. 1980. "Calories, Water, Lipid and Yolk in Avian Eggs." *Condor* 82 (Thomson 1964). JSTOR: 335–43.
- Carey, James R., and Debra S. Judge. 2002. *Longevity Records: Life Spans of Mammals, Birds, Amphibians, Reptiles, and Fish*. Odense University Press.
- Carrier, DR, and J. Auriemma. 1992. "A Developmental Constraint on the Fledging Time of Birds." *Biological Journal of the Linnean Society* 47: 61–77.
- Carvalho, Elildo A. R., Juarez C. B. Pezzuti, and Mário Branco Maranhão. 2011. "Podocnemis Erythrocephala Nests in the Lower Tapajós River, Central Amazonia, Brazil." *Chelonian Conservation and Biology* 10 (1): 146–48.
- Casale, P, Ad Mazaris, and D Freggi. 2011. "Estimation of Age at Maturity of Loggerhead Sea Turtles *Caretta Caretta* in the Mediterranean Using Length-Frequency Data." *Endangered Species Research* 13 (2): 123–29. doi:10.3354/esr00319.
- Castelblanco-Martinez, Nataly. 2010. "Cognoscitive Capacities, Foraging Strategies and Social Structure: The Aquatic Mammals Case." *Revista Colombiana de Ciencia Animal* 2 (2): 270–85.
- Castleberry, S.B., M.T. Mengak, and W.M. Ford. 2006. "Neotoma Magister." *Mammalian Species* 789: 1–5.
- Castro-Arellano, I., H. Zarza, and R.A. Medellin. 2000. "Philander Opossum." *Mammalian Species* 638: 1–8.
- Castro-Franco, Rubén, María Guadalupe Bustos-Zagal, and Fausto R. Méndez-De la Cruz. 2011. "Variación En La Inversión Parental Y Masa Relativa de La Nidada En La Iguana de Cola Espinosa *Ctenosaura Pectinata* (Squamata: Iguanidae) En El Centro de México." *Revista Mexicana de Biodiversidad* 82 (1). Instituto de Biología, UNAM: 199–204.
- Ceballos, G., H. Zarza, and M.A. Steele. 2002. "Xenomys Nelsoni." *Mammalian Species* 704: 1–3.

- Chaverri, Gloriana, and Maarten J. Vonhof. 2011. "Reproduction and Growth in a Neotropical Insectivorous Bat." *Acta Chiropterologica* 13 (1). Museum and Institute of Zoology, Polish Academy of Sciences: 147–55.
- Chen, Ing, Alastair Watson, and Lien-Siang Chou. 2011. "Insights from Life History Traits of Risso's Dolphins (*Grampus Griseus*) in Taiwanese Waters: Shorter Body Length Characterizes Northwest Pacific Population." *Marine Mammal Science* 27 (2): E43–E64.
- Chinsamy, Anusuya, and Nicole Valenzuela. 2008. "Skeletochronology of the Endangered Side-Neck Turtle, *Podocnemis Expansa*." *South African Journal of Science* 104 (7-8). Academy of Science of South Africa: 311–14.
- Chiszar, D., S. Krauss, B. Shipley, T. Trout, and H.M. Smith. 2009. "Response of Hatchling Komodo Dragons (*Varanus Komodoensis*) at Denver Zoo to Visual and Chemical Cues Arising from Prey." *Zoo Biology* 28: 29–34.
- Chitty, John, and Aidan Raftery. 2013. *Essentials of Tortoise Medicine and Surgery*. John Wiley & Sons.
- Choate, J.R. 1973. "Cryptotis Mexicana." *Mammalian Species* 28: 1–3.
- Chruszcz, B., and R.M.R. Barclay. 2001. "Chalinolobus Gouldii." *Mammalian Species* 690: 1–4.
- Churchill, Sue. 2001. "Recovery Plan for the Sandhill Dunnart (*Sminthopsis Psammophila*)". Adelaide, South Australia.
- Cink, Calvin L. 2002. "Eastern Whip-Poor-Will (*Antrostomus Vociferus*)." In *The Birds of North America Online*, edited by A. Poole.
- Cintra, Renato. 1988. "Nesting Ecology of the Paraguayan Caiman (*Caiman Yacare*) in the Brazilian Pantanal." *Journal of Herpetology* 22 (2): 219–22.
- Clairmont, Lindsey. 2013. "The Role of Morphology in Diet and Flower Visitation by Five Species of Cuban Flower-Visiting Bats". The University of Western Ontario.
- Clark, Jamie L. 2009. "Testing Models on the Emergence and Nature of Modern Human Behavior: Middle Stone Age Fauna from Sibudu Cave (South Africa)". The University of Michigan.
- Clark Jr., H.O. 2005. "Otocyon Megalotis." *Mammalian Species* 766: 1–5.
- Clark Jr., H.O., J.D. Murdoch, D.P. Newman, and C.S. Sillero-Zubiri. 2009. "Vulpes Corsac." *Mammalian Species* 832: 1–8.
- Clarkson, K.E., and L.P. Laniawe. 2000. "Hawaiian Hawk (*Buteo Solitarius*)." In *The Birds of North America Online*, edited by A. Poole.
- Cleere, Nigel. 2010. *Nightjars: A Guide to Nightjars and Related Birds*. A&C Black.

- Clemente, Christofer J, Philip C Withers, Graham Thompson, and David Lloyd. 2011. "Evolution of Limb Bone Loading and Body Size in Varanid Lizards." *The Journal of Experimental Biology* 214 (Pt 18): 3013–20.
- Clemente, Christofer J., Philip C. Withers, and Graham G. Thompson. 2009. "Metabolic Rate and Endurance Capacity in Australian Varanid Lizards (Squamata: Varanidae: Varanus)." *Biological Journal of the Linnean Society* 97: 664–76.
- Coates, Jennifer. 2009. *Snakes*. Eldorado Ink.
- Cole, F. R., and D.E. Wilson. 2009. "Urocitellus Canus." *Mammalian Species* 834: 1–8.
- . 2010. "Microtus Miurus." *Mammalian Species* 855: 75–89.
- Cole, F. Russell, and Don E. Wilson. 2006. "Leptonycteris Yerbabuena." *Mammalian Species* 797: 1–7.
- Colket, E., and D.E. Wilson. 1998. "Taphozous Hildegardeae." *Mammalian Species* 597: 1–3.
- Collar, N. J., A. V. Andreev, S. Chan, M. J. Crosby, S. Subramanya, and J.A. Tobias. 2001. (Eds.) *Threatened Birds of Asia: The BirdLife International Red Data Book*. Edited by N. J. COLLAR, A. V. ANDREEV, S. CHAN, M. J. CROSBY, S. SUBRAMANYA, and J.A. Tobias. Cambridge, UK: BirdLife International.
- Collins, Joseph T., Suzanne L. Collins, and Travis W. Taggart. 2011. *Amphibians, Reptiles and Turtles of the Cimarron National Grassland, Kansas*. Second. U.S. Forest Service.
- Colwell, M.A., and Jr. J.R. Jehl. 1994. "Wilson's Phalarope (Phalaropus Tricolor)." In *The Birds of North America Online*, edited by A. Poole.
- Cooney, Stuart J. N. 2009. "Ecological Associations of the Hooded Parrot (Psephotus Dissimilis)". The Australian National University.
- Copur, Gulsen, Mikail Baylan, and Sibel Canogullari. 2010. "Egg Weight but Not Egg Shape Index, Determines the Hatchability in Japanese Quail (Coturnix Coturnix Japonica)." *Journal of Animal and Veterinary Advances* 9 (13): 1890–95.
- Corbalan, Valeria, and Ricardo Ojeda. 2004. "Spatial and Temporal Organisation of Small Mammal Communities in the Monte Desert, Argentina." *Mammalia* 68 (1): 5–14.
- Cordero, Gerardo Antonio, Rebecca Reeves, and Christopher W. Swarth. 2012. "Long Distance Aquatic Movement and Home-Range Size of an Eastern Mud Turtle, Kinosternon Subrubrum, Population in the Mid-Atlantic Region of the United States." *Chelonian Conservation and Biology* 11 (1): 121–24.
- Corlett, Richard T. 2011. "Vertebrate Carnivores and Predation in the Oriental (Indomalayan) Region." *The Raffles Bulletin of Zoology* 59 (2): 325 – 360.

- Corlett, Richard T. 2010. "Megafaunal Extinctions and Their Consequences in the Tropical Indo-Pacific." In *Altered Ecologies: Fire, Climate and Human Influence on Terrestrial Landscapes*, edited by Simon Haberle, Janelle Stevenson, and Matthew Prebble, Volume 32, 512. ANU E Press.
- Cortes-Calva, P., and S.T. Alvarez-Castaneda. 2001. "Peromyscus Dickeyi." *Mammalian Species* 659: 1–2.
- Cortes-Calva, P., S.T. Alvarez-Castaneda, and E. Yensen. 2001. "Neotoma Anthonyi." *Mammalian Species* 663: 1–3.
- Cortes-Calva, P., E. Yensen, and S.T. Alvarez-Castaneda. 2001. "Neotoma Martinensis." *Mammalian Species* 657: 1–3.
- Cosstos, E.D. 2010. "Lycalopex Sechurae." *Mammalian Species* 848: 1–6.
- Costello, Robert, and Alfred Rosenberger. 2013. "North American Mammals." *Smithsonian National Museum of Natural History*. <http://www.mnh.si.edu/mna/>.
- Cramer, M.J., and G.N. Camerson. 2001. "Geomys Texensis." *Mammalian Species* 679: 1–3.
- Cramer, M.J., M.R. Willig, and C. Jones. 2001. "Trachops Cirrhosus." *Mammalian Species* 656: 1–6.
- Crichton, Elizabeth G., and Philip H. Krutzsch. 2000. *Reproductive Biology of Bats*. Academic Press.
- Crick, Humphrey Q. P., Robert A. Robinson, Graham F. Appleton, Nigel A. Clark, and Angela D. Rickard. 2002. "Investigation into the Causes of the Decline of Starlings and House Sparrows in Great Britain". Thetford, Norfolk.
- Crome, FHJ, and HE Brown. 1979. "Notes on Social Organization and Breeding of the Orange-Footed Scrubfowl Megapodius Reinwardt." *Emu* 79 (3). CSIRO PUBLISHING: 111.
- Croxall, J.P., K. Reid, and P.A. Prince. 1999. "Diet, Provisioning and Productivity Responses of Marine Predators to Differences in Availability of Antarctic Krill." *Mar Ecol Prog Ser* 177: 115–31.
- Cryan, Paul M., and Blair O. Wolf. 2003. "Sex Differences in the Thermoregulation and Evaporative Water Loss of a Heterothermic Bat, Lasiurus Cinereus, during Its Spring Migration." *Journal of Experimental Biology* 206 (19): 3381–90.
- Cudworth, N.L., and J.L. Koprowski. 2010. "Microtus Californicus." *Mammalian Species* 868: 230–43.
- Cunha, Andr?? A., and Marcus V. Vieira. 2002. "Support Diameter, Incline, and Vertical Movements of Four Didelphid Marsupials in the Atlantic Forest of Brazil." *Journal of Zoology* 258 (4). Cambridge University Press: 419–26.
- Curry, Robert L., A. Townsend Peterson, and Tom A. Langen. 2002. "Western Scrub-Jay (Aphelocoma Californica)." In *The Birds of North America Online*, edited by A. Poole.

- Curtis, Odette E., R. N. Rosenfield, and J. Bielefeldt. 2006. "Cooper's Hawk (*Accipiter Cooperii*)." In *The Birds of North America Online*, edited by A. Poole.
- Cuthbert, Richard. 2004. "Breeding Biology of the Atlantic Petrel, *Pterodroma Incerta*, and a Population Estimate of This and Other Burrowing Petrels on Gough Island, South Atlantic Ocean." *Emu* 104 (3): 221–28.
- Dalponte, J.C. 2011. "Lycalopex Vetulus." *Mammalian Species* 847: 1–7.
- Daniels, Christopher B. 2011. *A Guide To Urban Wildlife: 250 Creatures You Meet on Your Street*. HarperCollins Australia.
- Das, Abhijit, Dhruvajyoti Basu, Laurel Converse, and Suresh C. Choudhury. 2012. "Herpetofauna of Katerniaghat Wildlife Sanctuary, Uttar Pradesh, India." *Journal of Threatened Taxa* 4 (5): 2553–68.
- Das, Abhijit, Arup Kumar Das, Pranjit Kumar Sarma, and Amarendra Kumar Singh. 2011. "An Assessment of Assisted Recovery of Gharial (*Gavialis Gangeticus*) in the River Systems of Northeast India."
- Davenport, J. 2011. "High-Trophic-Level Consumers: Trophic Relationships of Reptiles and Amphibians of Coastal and Estuarine Ecosystems." In *Treatise on Estuarine and Coastal Science*, edited by E. Wolanski and D.S. McLusky, Volume 6, 227–49. Waltham: Academic Press.
- Davies, S.J.J.F. 2002. *Ratites and Tinamous: Tinamidae, Rheidae, Dromaiidae, Casuariidae, Apterygidae, Struthionidae*.
- Davis, Jon R., and Dale F. DeNardo. 2010. "Seasonal Patterns of Body Condition, Hydration State, and Activity of Gila Monsters (*Heloderma Suspectum*) at a Sonoran Desert Site." *Journal of Herpetology* 44 (1). The Society for the Study of Amphibians and Reptiles: 83–93.
- Davis, Jr. William E., and John Kricher. 2000. "Glossy Ibis (*Plegadis Falcinellus*)." In *The Birds of North America Online*, edited by A. Poole.
- Davis, Scott. 2011. "Significant Breedings." *Turtle Survival August*: 20–23.
- Dawson, T.J., E. Finch, L. Freedman, I.D. Hume, Marilyn B. Renfree, and P.D. Temple-Smith. 1989. "Morphology and Physiology of the Metatheria." In *Fauna of Australia, Volume 1B*, edited by D.W. Walton and B.J. Richardson, 1227. CSIRO Publishing.
- Day, Robert H., Katherine J. Kuletz, and Debora A. Nigro. 1999. "Kittlitz's Murrelet (*Brachyramphus Brevirostris*)." In *The Birds of North America Online*, edited by A. Poole.
- De Buffrénil, Vivian, Frédérique Rimblot-Baly, and Vivian de Buffrénil. 1999. "Female Reproductive Output in Exploited Nile Monitor Lizard (*Varanus Niloticus* L.) Populations in Sahelian Africa." *Canadian Journal of Zoology* 77 (10). NRC Research Press Ottawa, Canada: 1530–39.
- De Carvalho, C.T. 1968. "Comparative Growth Rates of Hand-Raised Big Cats." *International Zoo Yearbook* 8: 56–59.

- De Graaf, R.M., and D.D. Rudis. 1983. *Amphibians and Reptiles of New England*.
- De Jong, M.J. 1996. "Northern Rough-Winged Swallow (*Stelgidopteryx Serripennis*).” In *The Birds of North America Online*, edited by A. Poole.
- De Lisle, H.F. 1996. *The Natural History of Monitor Lizards*.
- De Magalhães, J P, and J Costa. 2009. "A Database of Vertebrate Longevity Records and Their Relation to Other Life-History Traits." *Journal of Evolutionary Biology* 22 (8): 1770–74. doi:10.1111/j.1420-9101.2009.01783.x.
- De Mello Beisiegel, B., and G.L. Zuercher. 2005. "Speothos Venaticus." *Mammalian Species* 783: 1–6.
- De Villa-Meza, A., R. Avila-Flores, A.D. Cuaron, and D. Valenzuela-Galvan. 2011. "Procyon Pygmaeus." *Mammalian Species* 877: 87–93.
- De Zeeuw, Martijn. 2010. "Husbandry and Reproduction of *Varanus Glaurti* in Captivity." *Biawak* 4 (3): 103–7.
- Debey, Lauren B., and Nicholas D. Pyenson. 2013. "Osteological Correlates and Phylogenetic Analysis of Deep Diving in Living and Extinct Pinnipeds: What Good Are Big Eyes?" *Marine Mammal Science* 29 (1): 48–83.
- Debus, S.J.S., and A.J. Ley. 2009. "Aspects of the Breeding Cycle of the Little Eagle *Hieraetus Morphnoides*." *Australian Field Ornithology* 26: 76–99.
- Debus, Stephen. 2012. *Birds of Prey of Australia: A Field Guide*. Csiro Publishing.
- Decher, J., and J. Fahr. 2005. "Hipposideros Cyclops." *Mammalian Species* 763: 1–7.
- Deeming, D. Charles, and Thomas W. Pike. 2013. "Embryonic Growth and Antioxidant Provision in Avian Eggs." *Biol. Lett.* 9 (6): 1744–957X.
- Dekker, René W. R. J., and Tim G. Brom. 1990. "Maleo Eggs and the Amount of Yolk in Relation to Different Incubation Strategies in Megapodes." *Australian Journal of Zoology* 38: 19–24.
- Delaney, R., Y. Fukuda, and K. Saalfeld. 2009. "Management Program for the Magpie Goose (*Anseranas Semipalmata*) in the Northern Territory of Australia, 2009–2014". Palmerston, NT.
- Delciellos, Ana Claudia, and Marcus Vinicius Vieira. 2006. "Arboreal Walking Performance in Seven Didelphid Marsupials as an Aspect of Their Fundamental Niche." *Austral Ecology* 31 (4): 449–57.
- Delson, Eric, Carl J. Terranova, William L. Jungers, Eric J. Sargis, Nina G. Jablonski, and Paul C. Dechow. 2000. "Body Mass in Cercopithecidae (Primates, Mammalia): Estimation and Scaling in Extinct and Extant Taxa." *Anthropological Papers of the American Museum of Natural History* 83: 159.

- Deppenbusch, Nathan Thomas. 2011. "Atmospheric Energy Harvesting for Small Uninhabited Aircraft by Gust Soaring". Pennsylvania State University.
- DeVogelaere, Andrew, Steve I. Lonhart, Chad King, Jennifer Brown, and Scott Chapman. 2012. "Species Database." *SIMoN: Sanctuary Integrated Monitoring Network*. <http://sanctuarysimon.org/species/>.
- Díaz, G.B., R.A. Ojeda, M.H. Gallardo, and S.M. Giannoni. 2000. "Tymanoctomys Barrerae." *Mammalian Species* 646: 1–4.
- Díaz-N., Juan F., Marcela Gómez-Laverde, and Camilo Sánchez-Giraldo. 2011. "Rediscovery and Redescription of *Marmosops Handleyi* (Pine, 1981) (Didelphimorphia: Didelphidae), the Least Known Andean Slender Mouse Opossum." *Mastozoología Neotropical* 18 (1). Sociedad Argentina para el Estudio de los Mamíferos: 45–61.
- Díaz-Paniagua, C., C. Keller, and A. C. Andreu. 2011. "Clutch Frequency, Egg and Clutch Characteristics, and Nesting Activity of Spur-Thighed Tortoises, *Testudo Graeca*, in Southwestern Spain", February. NRC Research Press Ottawa, Canada.
- Díaz-Paniagua, Carmen, Claudia Keller, and Ana C. Andreu. 1997. "Hatching Success, Delay of Emergence and Hatchling Biometry of the Spur-Thighed Tortoise, *Testudo Graeca*, in South-Western Spain." *Journal of Zoology* 243 (3): 543–53.
- Díaz-Valenzuela, Román, Nubia Zoé Lara-Rodríguez, Raúl Ortiz-Pulido, Fernando González-García, and Aurelio Ramírez Bautista. 2011. "Some Aspects of the Reproductive Biology Of The Mexican Sheartail ( *Doricha Eliza* ) in Central Veracruz." *The Condor* 113 (1). University of California Press: 177–82.
- Dickison, Michael R. 2007. "The Allometry of Giant Flightless Birds". Duke.
- Dickman, Chris R. 1996. "Overview of the Impact of Feral Cats on Australian Native Fauna."
- . 2003. "Positive Effects of Rodents on Biota in Arid Australian Systems." In *Rats, Mice and People: Rodent Biology and Management*, edited by Grant R. Singleton, Lyn A. Hinds, Charles J. Krebs, and Dave M. Spratt, 69–74. Canberra: Australian Centre for International Agricultural Research.
- Dickman, Christopher R., Adele S. Haythornthwaite, Gayle H. McNaught, Paul S. Mahon, Bobby Tamayo, and Mike Letnic. 2001. "Population Dynamics of Three Species of Dasyurid Marsupials in Arid Central Australia: A 10-Year Study." *Wildlife Research* 28 (5). CSIRO PUBLISHING: 493–506.
- Dobie, J.L. 1971. "Reproduction and Growth in the Alligator Snapping Turtle, *Macrochelys Temminckii* (Troost)." *Copeia* 4: 645–58.
- Dobson, F. Stephen, and Pierre Jouventin. 2010. "The Trade-off of Reproduction and Survival in Slow-Breeding Seabirds." *Canadian Journal of Zoology* 88 (9): 889–99. doi:10.1139/Z10-054.
- Dodd, C. Kenneth. 2002. *North American Box Turtles: A Natural History*. Volume 6. University of Oklahoma Press.



- Dominguez-Castellanos, Y., and J. Ortega. 2003. "Liomys Spectabilis." *Mammalian Species* 718: 1–3.
- Doody, J. Sean, Arthur Georges, and Jeanne E. Young. 2003. "Twice Every Second Year: Reproduction in the Pig-Nosed Turtle, *Carettochelys Insculpta*, in the Wet–dry Tropics of Australia." *Journal of Zoology* 259 (2): 179–88. doi:10.1017/S0952836902003217.
- Dragoo, J.W., and S.R. Sheffield. 2009. "Conepatus Leuconotus." *Mammalian Species* 827: 1–8.
- Drummond, Brie A., and Marty L. Leonard. 2009. "Breeding Biology of the Fork-Tailed Storm-Petrel *Oceanodroma Furcata* on Kasatochi Island, Aleutian Islands, Alaska." *Marine Ornithology* 37: 265–73.
- Dryden, G.L., B. Green, E.D. Wikramanayake, and K.G. Dryden. 1992. "Energy and Water Turnover in Two Tropical Varanid Lizards, *Varanus Bengalensis* and *V. Salvator*." *Copeia* 1: 102–7.
- Du, Wei-Guo, Ming-Chung Tu, Rajkumar S Radder, and Richard Shine. 2013. "Can Reptile Embryos Influence Their Own Rates of Heating and Cooling?" Edited by Andrej A. Romanovsky. *PLoS One* 8 (6). Public Library of Science: e67095.
- Duli, Norkarmila Binti. 2009. "Morphometric and Genetic Variability of River Terrapin, (Batagur Baska) and Painted Terrapin, (Batagur Borneoensis)". Universiti Sains Malaysia.
- Duncan, WP., and JL. Marcon. 2009. "Enzymes of Energy Metabolism in Hatchlings of Amazonian Freshwater Turtles (Testudines, Podocnemididae)." *Brazilian Journal of Biology* 69 (2). Instituto Internacional de Ecologia: 319–25.
- Dundas, Shannon Jean. 2008. "Utilisation of *Phytophthora Cinnamomi* Affected Habitats by Honey Possums (*Tarsipes Rostratus*) in the Cape Riche Area, Western Australia". Murdoch University.
- Dunning, John B. Jr. 1992. *CRC Handbook of Avian Body Masses*. CRC Press.
- Dunnum, J.L., and J. Salazar-Bravo. 2004. "Dactylomys Boliviensis." *Mammalian Species* 745: 1–4.
- Durant, D. 2003. "The Digestion of Fibre in Herbivorous Anatidae - a Review", 7–24.
- Dwyer, Q., and M. Perez. 2007. "Husbandry and Reproduction of the Black Water Monitor *Varanus Salvator Komaini*." *Biawak* 1: 13–20.
- Dyke, Gareth J., and Gary W. Kaiser. 2010. "Cracking a Developmental Constraint: Egg Size and Bird Evolution." In *Records of the Australian Museum*, 62:207–16. doi:10.3853/j.0067-1975.62.2010.1547.
- Eger, J.L., and M.B. Fenton. 2003. "Rhinolophus Paradoxolophus." *Mammalian Species* 731: 1–4.
- Eisemberg, Carla C., Mark Rose, Benedict Yaru, and Arthur Georges. 2011. "Demonstrating Decline of an Iconic Species under Sustained Indigenous Harvest – The Pig-Nosed Turtle (*Carettochelys Insculpta*) in Papua New Guinea." *Biological Conservation* 144 (9): 2282–88.

- El Din, S. B. 2006. *A Guide to the Reptiles and Amphibians of Egypt*.
- El Mouden, El Hassan, Mohammed Znari, and Richard P. Brown. 1999. "Skeletochronology and Mark ± Recapture Assessments of Growth in the North African Agamid Lizard ( *Agama Impalearis* )." *Journal of Zoology, London* 249: 455–61.
- Ellis, Richard. 2012. *No Turning Back: The Extinction Scenario*. Open Road Media.
- Ellison, K., and P.E. Lowther. 2009. "Bronzed Cowbird (*Molothrus Aeneus*)." In *The Birds of North America Online*, edited by A. Poole.
- Ellison, Laura. 2008. "Summary and Analysis of the U.S. Government Bat Banding Program". 2008-1363. *Publications of the US Geological Survey*. U.S. Geological Survey Open-File Report.
- Elsley, R.M, and A.R. Woodward. 2010. "American Alligator *Alligator Mississippiensis*." In *Crocodyles. Status Survey and Conservation Action Plan*, edited by S.C. Manolis and C. Stevenson, Third Edit, 1–4. Crocodile Specialist Group. Darwin.
- Enge, K.M., K.L. Krysko, and B.L. Talley. 2004. "Distribution and Ecology of the Introduced African Rainbow Lizard, *Agama Agama africana*(Sauria: Agamidae), in Florida." *Florida Scientist* 67 (1). FLORIDA ACADEMY OF SCIENCES, INC. 303–10.
- Enkerlin-Hoeflich, Ernesto C., and Kelly M. Hogan. 1997. "Red-Crowned Parrot (*Amazona Viridigenalis*)." In *The Birds of North America Online*, edited by A. Poole.
- Erickson, Gregory M, Paul M Gignac, Scott J Steppan, A Kristopher Lappin, Kent A Vliet, John D Brueggen, Brian D Inouye, David Kledzik, and Grahame J W Webb. 2012. "Insights into the Ecology and Evolutionary Success of Crocodylians Revealed through Bite-Force and Tooth-Pressure Experimentation." Edited by Leon Claessens. *PloS One* 7 (3). Public Library of Science: e31781.
- Ernest, S. K. Morgan, Brian J. Enquist, James H. Brown, Eric L. Charnov, James F. Gilgooly, Van M. Savage, Ethan P. White, et al. 2003. "Thermodynamic and Metabolic Effects on the Scaling of Production and Population Energy Use." *Ecology Letters* 6 (11): 990–95. doi:10.1046/j.1461-0248.2003.00526.x.
- Ernst, Carl H., and Jeffrey E. Lovich. 2009. *Turtles of the United States and Canada*. JHU Press.
- Eshelman, B.D., and C.S. Sonnemann. 2000. "Spermophilus Armatus." *Mammalian Species* 637: 1–6.
- Evans, K., and M.A. Hindell. 2004. "The Age Structure and Growth of Female Sperm Whales (*Physeter Macrocephalus*) in Southern Australian Waters." *Journal of the Zoological Society of London* 263: 237–50.
- Fantin, C., I.P. Farias, L.A.S. Monjelo, and T. Hrbek. 2010. "Polyandry in the Red-Headed River Turtle *Podocnemis Erythrocephala* (Testudines, Podocnemididae) in the Brazilian Amazon." *Genetics and Molecular Research* 9 (1): 435–40.

- Farke, Andrew A, and Justy Alicea. 2009. "Femoral Strength and Posture in Terrestrial Birds and Non-Avian Theropods." *Anatomical Record (Hoboken, N.J. : 2007)* 292 (9): 1406–11. doi:10.1002/ar.20963.
- Farquhar, C. 2005. "White-Tailed Hawk (*Buteo Albicaudatus*)." In *The Birds of North America Online*, edited by A. Poole.
- Fathinia, B., N. Rastegar-Pouyani, H. Darvishnia, and M. Rajabizadeh. 2010. "The Snake Fauna of Ilam Province, Southwestern Iran." *Iranian Journal of Animal Biosystematics* 6 (1): 9–23.
- Feare, Chris J. 2002. "Influence of Date and Body Mass at Fledging on Long-Term Survival of Sooty Terns *Sterna Fuscata*." *Marine Ornithology* 30: 46–47.
- Fernandez, J.A., F. Garcia-Campusano, and M.S. Hafner. 2010. "Peromyscus Difficilis." *Mammalian Species* 867: 220–29.
- Ferreira, Mariana Silva, Maja Kajin, Marcus Vinícius Vieira, Priscilla Lórá Zangrandi, Rui Cerqueira, and Rosana Gentile. 2013. "Life History of a Neotropical Marsupial: Evaluating Potential Contributions of Survival and Reproduction to Population Growth Rate." *Mammalian Biology - Zeitschrift Für Säugetierkunde* 78 (6): 406–11.
- Ferronato, B.O., T.S. Marques, I. Guardia, A.L.B. Longo, C.I. Pina, J. Bertoluci, and L.M. Verdade. 2009. "The Turtle *Trachemys Scripta Elegans* (Testudines, Emydidae) as an Invasive Species in a Polluted Stream of Southeastern Brazil." *Herpetological Bulletin* 109: 29 – 34.
- Ferronato, Bruno O., and Victor M. Morales. 2012. "Biology and Conservation of the Freshwater Turtles and Tortoises of Peru." *IRCF Reptiles & Amphibians* 19 (2): 103–16.
- Filippi, Dominique, Susan Waugh, and Simon Nicol. 2010. "Revised Spatial Risk Indicators for Seabird Interactions with Longline Fisheries in the Western and Central Pacific". Nukualofa, Tonga.
- Flinders, Jerran T., Duke S. Rogers, Jackee L. Webber-Alston, and Harry A. Barber. 2002. "Mammals of the Grand Staircase-Escalante National Monument: A Literature and Museum Survey." *Monographs of the Western North American Naturalist* 1: 1–64.
- Flores, David A, Fernando Abdala, and Norberto P Giannini. 2013. "Post-Weaning Cranial Ontogeny in Two Bandicoots (Mammalia, Peramelomorpha, Peramelidae) and Comparison with Carnivorous Marsupials." *Zoology (Jena, Germany)* 116 (6): 372–84.
- Fokidis, H. Bobby, and Thomas S. Risch. 2008. "The Burden of Motherhood: Gliding Locomotion in Mammals Influences Maternal Reproductive Investment." *Journal of Mammalogy* 89 (3): 617–25.
- Forsyth, David M., Janet M. Wilmshurst, Robert B. Allen, and David A. Coomes. 2010. "Impacts of Introduced Deer and Extinct Moa on New Zealand Ecosystems." *New Zealand Journal of Ecology* 34 (1): 48–65.

- Fowler, Murray E., Zalmir S. Cubas, and (Eds.). 2008. *Biology, Medicine, and Surgery of South American Wild Animals*. Edited by Murray E. Fowler and Zalmir S. Cubas. John Wiley & Sons.
- Fransson, T., T. Kolehmainen, C. Kroon, L. Jansson, and T. Wenninger. 2010. "EURING List of Longevity Records for European Birds."
- Franz, Ragna, Carla R Soliva, Michael Kreuzer, Jean-Michel Hatt, Samuel Furrer, Jürgen Hummel, and Marcus Clauss. 2011. "Methane Output of Tortoises: Its Contribution to Energy Loss Related to Herbivore Body Mass." Edited by Brock Fenton. *PLoS One* 6 (3). Public Library of Science: e17628.
- Frey, J.K., and F.A. Cervantes. 1997. "Microtus Oaxacensis." *Mammalian Species* 556: 1–3.
- Frick, Winifred F., Ryan D. Price, Paul A. III Heady, and Kathleen M. Kay. 2013. "Insectivorous Bat Pollinates Columnar Cactus More Effectively per Visit than Specialized Nectar Bat." *The American Naturalist* 181 (1): 137–44.
- Fry, C. Hilary. 2010. *The Bee-Eaters*. A&C Black.
- Frýdlová, Petra, and Daniel Frynta. 2010. "A Test of Rensch's Rule in Varanid Lizards." *Biological Journal of the Linnean Society* 100 (2). Wiley Online Library: 293–306.
- Frýdlová, Petra, Jan Hnízdo, Petr Velenský, Olga Šimková, Veronika Cikánová, Lenka Chylíková, and Daniel Frynta. 2013. "Easy Life of Males? Indirect Evidence That Growth Is Easier than Egg Production in Mangrove-Dwelling Monitor Lizards (Varanus Indices)." *Acta Herpetologica*.
- Fukuda, Daisuke, Oswald Braken Tisen, Kuniyasu Momose, and Shoko Sakai. 2009. "Bat Diversity in the Vegetation Mosaic around a Lowland Dipterocarp Forest of Borneo." *The Raffles Bulletin of Zoology* 57 (1): 213–21.
- Furtado dos Reis, S., and L.M. Pessoa. 2004. "Thrichomys Apereoides." *Mammalian Species* 741: 1–5.
- Gaikhorst, Glen, James McLaughlin, Brian Larkin, and Meagan McPharlin. 2009. "Successful Captive Breeding of Mitchell's Water Monitor, Varanus Mitchellii (Mertens 1958), at Perth Zoo." *Zoo Biology* 29 (5): 615–25.
- Galindo-Galindo, Cristobal, Alondra Castro-Campillo, Arturo Salame-Mendez, and Jose Ramirez-Pulido. 2000. "Reproductive Events and Social Organization in a Colony of Anoura Geoffroyi (Chiroptera: Phyllostomidae) from a Temperate Mexican Cave." *Acta Zool. Mex.* 80: 51–68.
- Gallo-Reynoso, Juan-Pablo, and Ana-Luisa Figueroa-Carranza. 2010. "Pup Growth of the Guadalupe Fur Seal, Arctocephalus Townsendi." *THERYA* 1 (1): 75–90.
- Gannon, Michael R. 2005. *Bats of Puerto Rico: An Island Focus and a Caribbean Perspective*. Texas Tech University Press.
- Garcia, P.F.J., S.A. Rasheed, and S.L. Holroyd. 1995. "Status of the Western Small-Footed Myotis in British Columbia". WR-74. Wildlife Working Report. Victoria, B.C.

- Garratt, Michael, Robert C Brooks, Jean-François Lemaître, and Jean-Michel Gaillard. 2014. "Female Promiscuity and Maternally Dependent Offspring Growth Rates in Mammals." *Evolution; International Journal of Organic Evolution* 68 (4): 1207–15.
- Gaskin, D.E. 1972. *Whales, Dolphins, and Seals*. Heinemann Educational Publishers.
- Gauger, Vanessa H. 1999. "Black Noddy (Anous Minutus)." In *The Birds of North America Online*, edited by A. Poole.
- Gaulke, Maren. 2010. "Overview on the Present Knowledge on Varanus Mabitang Gaulke and Curio, 2001, Including New Morphological and Meristic Data." *Biawak* 4 (2): 50–58.
- Gavrilov, V. M. 2012. "Fundamental Energetics of Birds: 1. The Maximum Ability of Birds to Change Their Thermal Conductance and the Efficiency of Metabolic Energy Transformation into Mechanical Work." *Biology Bulletin* 39 (7): 569–78.
- Geiser, F. 2004. "The Role of Torpor in the Life of Australian Arid Zone Mammals." *Australian Mammalogy* 26 (2). CSIRO PUBLISHING: 125–34.
- Geiser, Fritz, and R.V. Baudinette. 1990. "The Relationship between Body Mass and Rate of Rewarming from Hibernation and Daily Torpor in Mammals." *Journal of Experimental Biology* 151 (1): 349–59.
- Geiser, Fritz, and Gerhard Kortner. 2010. "Hibernation and Daily Torpor in Australian Mammals." *Australian Zoologist* 35 (2): 204–15.
- Geiser, Fritz, and Christopher Turbill. 2009. "Hibernation and Daily Torpor Minimize Mammalian Extinctions." *Die Naturwissenschaften* 96 (10): 1235–40.
- Genoways, H.H., and R.J. Baker. 1972. "Stenoderma Rufum." *Mammalian Species* 18: 1–4.
- Germano, DJ. 1992. "Longevity and Age-Size Relationships of Populations of Desert Tortoises." *Copeia* 2: 367–74.
- Giannini, N.P., and R.M. Barquez. 2003. "Sturnira Erythromos." *Mammalian Species* 729: 1–5.
- Gienger, CM C.M., GW Walker Johnson, Matthew McMillan, Scott Sheldon, and C. Richard Tracy. 2005. "Timing of Hatching in Beaded Lizards (Heloderma Horridum)." *Sonoran Herpetologist* 18 (8): 93.
- Gimenez, Analia L., Norberto P. Giannini, Mauro I. Schiaffini, and Gabriel M. Martin. 2012. "New Records of the Rare Histiotus Magellanicus (Chiroptera, Vespertilionidae) and Other Bats from Central Patagonia, Argentina." *Mastozoologia Neotropical* 19 (2): 213–24.
- Glaw, F., J. Kohler, T.M. Townsend, and M. Vences. 2010. "Rivaling the World's Smallest Reptiles: Discovery of Miniaturized and Microendemic New Species of Leaf Chamaeleons (Brookesia) from Northern Madagascar." *PLoS One* 7: e31314.

- Glaw, Frank, Jörn Köhler, Ted M Townsend, and Miguel Vences. 2012. "Rivaling the World's Smallest Reptiles: Discovery of Miniaturized and Microendemic New Species of Leaf Chameleons (Brookesia) from Northern Madagascar." Edited by Nicolas Salamin. *PloS One* 7 (2). Public Library of Science: e31314.
- Gokula, V. 2011. "Breeding Biology of the Spot-Billed Pelican (*Pelecanus Philippensis*) in Karaivetti Bird Sanctuary, Tamil Nadu, India." *Chinese Birds* 2 (2): 101–8. doi:10.5122/cbirds.2011.0013.
- Goldberg, Stephen R., and Kent R. Beaman. 2012. "Reproduction of the Spiny Chuckwalla (*Sauromalus Hispidus*) and Teh Pidbald Chuckwalla (*Sauromalus Varius*) (Squamata: Iguanidae) from Mexico." *Sonoran Herpetologist* 25 (5): 40–42.
- Gombobaatar, Sundev, Biraazana Odkhuu, Reuven Yosef, Bayandonoï Gantulga, Purevdorj Amartuvshin, and Dorj Usukhjargal. 2010. "Reproductive Ecology of the Upland Buzzard (*Buteo Hemilasius*) on the Mongolian Steppe." *Journal of Raptor Research* 44 (3). The Raptor Research Foundation: 196–201.
- Gompper, M.E., and A.T. Vanak. 2006. "Vulpes Bengalensis." *Mammalian Species* 795: 1–5.
- Goncalves, Larissa Oliveira. 2013. "Discriminando Multiplos Fatores Determinantes Da Particao de Nicho Em Pequenos Mamiferos Sul-Americanos". Instituto de Biociencias da Universidade.
- Gonzales, M.V., B. Armien, A. Armien, and J. Salazar-Bravo. 2004. "Liomys Adspersus." *Mammalian Species*.
- González, Luis Mariano, Javier Oria, Antoni Margalida, Roberto Sánchez, Luis Prada, Javier Caldera, Antonio Aranda, and Jose Ignacio Molina. 2006. "Effective Natal Dispersal and Age of Maturity in the Threatened Spanish Imperial Eagle *Aquila Adalberti* : Conservation Implications: Capsule Dispersive Capacity Appears Sufficient to Establish Natural Re-Occupation of the Former Range." *Bird Study* 53 (3). Taylor & Francis: 285–93.
- Göth, Ann, and Uwe Vogel. 2004. "Is Monogamy in the Polynesian Megapode (*Megapodius Pritchardii*) Related to Its High Relative Egg-Weight?" *The Auk* 121 (2). The American Ornithologists' Union: 308.
- Graham, Scott Alan. 2012. "Diet Composition, Niche and Geographic Characteristics, and Prey Size Preference of Barred Owls (*Strix Varia*) in the Pacific Northwest". Boise State University.
- Greene, H.W. 1997. *Snakes: The Evolution of Mystery in Nature*.
- Greene, Sara, Suzanne McConnachie, Stephen Secor, and Mike Perrin. 2013. "The Effects of Body Temperature and Mass on the Postprandial Metabolic Responses of the African Egg-Eating Snakes *Dasypeltis Scabra* and *Dasypeltis Inornata*." *Comparative Biochemistry and Physiology. Part A, Molecular & Integrative Physiology* 165 (2): 97–105.
- Greenhall, A.M., U. Schmidt, and G. Joermann. 1984. "Diphylla Ecaudata." *Mammalian Species* 227: 1–3.

- Greenlaw, Jon S., and James D. Rising. 1994. "Saltmarsh Sparrow (*Ammodramus Caudacutus*)." In *The Birds of North America Online*, edited by A. Poole.
- Greer, A.E. 1989. *The Biology and Evolution of Australian Lizards*.
- Greer, A.E. 1997. *The Biology and Evolution of Australian Snakes*.
- Gregorovicova, Martina, Oldrich Zahradnicek, Abigail S. Tucker, Petr Velensky, and Ivan Horacek. 2012. "Embryonic Development of the Monitor Lizard, *Varanus Indicus*." *Amphibia-Reptilia* 33 (3-4): 451–68.
- Grenier, Martin B. 2011. "Threatened, Endangered, and Nongame Bird and Mammal Investigations."
- Gressler, Daniel T, Luane R Santos, Luciana V Paiva, Charles Duca, T Lilian, Sheila S Rodrigues, Leonardo F França, et al. 2012. "Breeding Biology of Birds in the Cerrado." *ORNITOLOGIA NEOTROPICAL* 23: 385–405.
- Grzybowski, J.A. 1995. "Black-Capped Vireo (*Vireo Atricapilla*)." In *The Birds of North America Online*, edited by A. Poole.
- Guarino, Fabio M., Ivan Di Gia, and Roberto Sindaco. 2010. "Age and Growth of the Sand Lizards (*Lacerta Agilis*) from a High Alpine Population of North-Western Italy." *Acta Herpetologica* 5 (1): 23–29.
- Guay, P.J., and A N Iwaniuk. 2008. "Interspecific Variation in Relative Brain Size Is Not Correlated with Intensity of Sexual Selection in Waterfowl (Anseriformes)." *Australian Journal of Zoology* 56: 311–21.
- Gur, M.K., and H. Gur. 2010. "Spermophilus Xanthopymnus." *Mammalian Species* 864: 183–94.
- Gutierrez, Joel Antu, Carla Piantoni, and Nora R. Ibarquengoytia. 2013. "Altitudinal Effects on Life History Parameters in Populations of *Liolaemus Pictus Argentinus* (Sauria: Liolaemidae)." *Acta Herpetologica* 8 (1): 9–17.
- Guzman, Alejandra. 2008. "Bite Performance and Feeding Kinematics in Loggerhead Turtles (*Caretta Caretta*) Within the Context of Longline Fishery Interactions". Texas A&M.
- HALL, P. M., and D. R. JOHNSON. 1987. "Nesting Biology of *Crocodylus Novaeguineae* in Lake Murray District, Papua New Guinea." *Herpetologica* 43 (2). Herpetologists' League: 249–58.
- Hammond, Paula. 2009. *The Atlas of the World's Most Dangerous Animals: Mapping Nature's Born Killers*. Marshall Cavendish.
- Harding. 2010. "Trachypithecus Cristatus." *Mammalian Species* 42: 149–65.
- Harris, J.M. 2009a. "Cercartetus Concinnus." *Mammalian Species* 831: 1–11.
- . 2009b. "Cercartetus Lepidus." *Mammalian Species* 842: 1–8.

- Harris, J.M., and K.S. Maloney. 2010. "Petauroides Volans." *Mammalian Species* 866: 207–19.
- Harris, Tim. 2009. *National Geographic Complete Birds of the World*. illustrate. National Geographic Books.
- Hart, E.B. 1992. "Tamias Dorsalis." *Mammalian Species* 399: 1–6.
- Hart, E.B., M.C. Belk, E. Jordan, and M.W. Gonzalez. 2004. "Zapus Princeps." *Mammalian Species* 749: 1–7.
- Hart, R.P., and D.J. Kitchener. 1986. "First Record of Sminthopsis Psammophila (Marsupialia: Dasyuridae) from Western Australia." *Records of the Western Australia Museum* 13 (1): 139–44.
- Hartmann, Caroline Maria. 2009. "Studies on the Composition of Reptile Eggs". University of Munich.
- Hassel, Alison. 2014. "Personal Communication."
- Hawkins, Frank. 2013. *The Birds of Africa: Volume VIII: The Malagasy Region: Madagascar, Seychelles, Comoros, Mascarenes*. Edited by Roger Safford. illustrate. A&C Black.
- Hayes, D. Lindsey. 1995. "A Comparison of the Breeding and Feeding Ecology of Pigeon Guillemots at Naked and Jackpot Islands in Prince William Sound". Anchorage, AK.
- Hayssen, V. 2008. "Reproductive Effort in Squirrels: Ecological, Phylogenetic, Allometric, and Latitudinal Patterns." *Journal of Mammalogy* 89: 582–606.
- . 2009a. "Bradypus Torquatus." *Mammalian Species* 829: 1–5.
- . 2009b. "Bradypus Tridactylus." *Mammalian Species* 839: 1–9.
- . 2010. "Bradypus Variegatus." *Mammalian Species* 850: 19–32.
- . 2011a. "Choloepus Hoffmanni." *Mammalian Species* 873: 37–55.
- . 2011b. "Tamandua Tetradactyla." *Mammalian Species* 43: 64–74.
- Hayssen, Virginia D., and Ari Van Tienhoven. 1993. *Asdell's Patterns of Mammalian Reproduction: A Compendium of Species-Specific Data*. Cornell University Press.
- Haythornthwaite, A. S., and C. R. Dickman. 2006. "Long-Distance Movements by a Small Carnivorous Marsupial: How Sminthopsis Youngsoni (Marsupialia: Dasyuridae) Uses Habitat in an Australian Sandridge Desert." *Journal of Zoology* 270 (3): 543–49.
- Hayward, G. D., and P. H. Hayward. 1993. "Boreal Owl (Aegolius Funereus)." In *The Birds of North America Online*, edited by A. Poole.



- Hayward, J.L., and N.A. Verbeek. 2008. "Glaucous-Winged Gull." In *The Birds of North America Online*, edited by A. Poole.
- Headland, Thomas N, and Harry W Greene. 2011. "Hunter-Gatherers and Other Primates as Prey, Predators, and Competitors of Snakes." *Proceedings of the National Academy of Sciences of the United States of America* 108 (52): E1470–4.
- Heathcote, Peter. 2010. *Lizards*. Capstone Classroom.
- Heatwole, H.F., and J. Taylor. 1987. *Ecology of Reptiles*.
- Hedenström, A, L C Johansson, M Wolf, R von Busse, Y Winter, and G R Spedding. 2007. "Bat Flight Generates Complex Aerodynamic Tracks." *Science (New York, N.Y.)* 316 (5826): 894–97. doi:10.1126/science.1142281.
- Hedges, S. Blair. 2008. "At the Lower Size Limit in Snakes: Two New Species of Threadsnakes (Squamata: Leptotyphlopidae: Leptotyphlops) from the Lesser Antilles." *Zootaxa* 1841: 1–30.
- Heideman, P. D., P. Deoraj, and F. H. Bronson. 1992. "Seasonal Reproduction of a Tropical Bat, Anoura Geoffroyi, in Relation to Photoperiod." *Reproduction* 96 (2): 765–73.
- Heij, C.J. 1997. "The Behaviour of the Moluccan Megapode, Eulipoa Wallacei (Aves: Megapodidae) in Nesting Grounds." *Treubia* 31 (1991): 169–76.
- Heij, C.J., C.F.E. Rompas, and C.W. Moeliker. 1997. "The Biology of the Moluccan Megapode Eulipoa Wallacei (Aves, Galliformes, Megapodiidae) on Haruku and Other Moluccan Islands; Part 2: Final Repor." *DEINSEA: Jaarbericht van Het Natuurmuseum Rotterdam : Annual of the Natural History Museum Rotterdam* 3: 1–123.
- Heinsohn, Robert, Tanya Zeriga, Stephen Murphy, Paul Igag, Sarah Legge, and Andrew L. Mack. 2009. "Do Palm Cockatoos (Probosciger Aterrimus) Have Long Enough Lifespans to Support Their Low Reproductive Success?" *Emu* 109 (3): 183–91.
- Heintzelman, D.S. 1981. *A World Guide to Whales, Dolphins, and Porpoises*.
- Helgen, Kristofer M. 2007. "The Mammal Fauna of the Kaijende Highlands, Enga Province, Papua New Guinea." In *RAP Bulletin of Biological Assessment 45: A Rapid Biodiversity Assessment of the Kaijende Highlands, Enga Province, Papua New Guinea*, edited by Stephen J. Richards, 97. Arlington, VA, USA: Center for Applied Biodiversity Science (CABS), Conservation International.
- Hellgren, E.C., R.T. Kazmaier, D.C. Ruthven III, and D.R. Synatzske. 2000. "Variation in Tortoise Life History: Demography of Gopherus Berlandieri." *Ecology* 81 (5). Eco Soc America: 1297–1310.
- Henry, Mickaël, and Kathryn E Stoner. 2011. "Relationship between Spatial Working Memory Performance and Diet Specialization in Two Sympatric Nectar Bats." *PloS One* 6 (9). Public Library of Science: e23773.

- Heppell, S.S. 1998. "Application of Life-History Theory and Population Model Analysis to Turtle Conservation." *Copeia* 1998 (2). JSTOR: 367–75.
- Herkert, James R., Peter D. Vickery, and Donald E. Kroodsma. 2002. "Henslow's Sparrow (*Ammodramus Henslowii*)." In *The Birds of North America Online*, edited by A. Poole.
- Hermes-Lima, Marcelo, Cecília Carreiro, Daniel C Moreira, Cássia Polcheira, Daniel P Machado, and Elida G Campos. 2012. "Glutathione Status and Antioxidant Enzymes in a Crocodilian Species from the Swamps of the Brazilian Pantanal." *Comparative Biochemistry and Physiology. Part A, Molecular & Integrative Physiology* 163 (2): 189–98.
- Herron, Jon C., Louise H. Emmons, and J.E. Cadle. 1990. "Observations on Reproduction in the Black Caiman, *Melanosuchus Niger*." *Journal of Herpetology* 24 (3): 314–16.
- Herron, M.D., and J.M. Waterman. 2004. "Xerus Erythropus." *Mammalian Species* 748: 1–4.
- Hibbitts, Toby J., Eric R. Pianka, Raymond B. Huey, and Martin J. Whitting. 2005. "Ecology of the Common Barking Gecko (*Ptenopus Garrulus*) in Southern Africa." *Journal of Herpetology* 39 (3): 509–15.
- Hice, Christine L. 2003. "The Non-Volant Mammals of the Estacion Biologica Allpahuayo: Assessment of the Natural History and Community Ecology of a Proposed Reserve". Texas Tech University.
- Hice, Christine L., and Paul M. Velazco. 2012. "The Non-Volant Mammals of the Reserva Nacional Allpahuayo-Mishana, Loreto, Peru". 60.
- Hickey, M. B. C., and M. B. Fenton. 1990. "Foraging by Red Bats (*Lasiurus Borealis*): Do Intraspecific Chases Mean Territoriality?" *Canadian Journal of Zoology* 68 (12). NRC Research Press Ottawa, Canada: 2477–82.
- Hickey, M. Brian C., Lalita Acharya, and Shannon Pennington. 1996. "Resource Partitioning by Two Species of Vespertilionid Bats (*Lasiurus Cinereus* and *Lasiurus Borealis*) Feeding around Street Lights." *Journal of Mammalogy* 77 (2): 325–34.
- Hickey, M.B.C., and J.M. Dunlop. 2000. "Nycteris Grandis." *Mammalian Species* 632: 1–4.
- Hill, J.E., and F.G. Rozendaal. 1989. "Records of Bats (Microchiroptera) from Wallacea." *Zoologische Mededelingen* 63 (9): 97–122.
- Hillman, C.N., and T.W. Clark. 1980. "Mustela Nigripes." *Mammalian Species* 126: 1–3.
- Hinlo, Rheyda Penetrante. 2010. "Population Genetics and Conservation of the Philippine Crocodile". Massey University.
- Hitchins, P. M., O. Bourquin, S. Hitchins, and S. E. Piper. 2004. "Biometric Data on Hawksbill Turtles (*Eretmochelys Imbricata*) Nesting at Cousine Island, Seychelles." *Journal of Zoology* 264 (4): 371–81.

- Hocking, Paul M., and (Ed.). 2009. *Biology of Breeding Poultry*. Edited by Paul M. Hocking. illustrate. CABI.
- Hofmeyr, M D, B T Henen, and V J T Loehr. 2005. "Overcoming Environmental and Morphological Constraints : Egg Size and Pelvic Kinesis in the Smallest Tortoise , Homopus Signatus." *Canadian Journal of Zoology* 83: 1343–52. doi:10.1139/Z05-132.
- Hogstad, Olav. 2006. "Reproductive Differences between Woodpeckers and Secondary Hole-Nesters." *Ornis Norvegica* 29: 110–23.
- Hollis, L. 2005. "Artibeus Planirostris." *Mammalian Species* 775: 1–6.
- Holloway, Gillian L., and Robert M.R. Barclay. 2001. "Myotis Ciliolabrum." *Mammalian Species* 670: 1–5.
- Holman, J. Alan. 2012. *The Amphibians and Reptiles of Michigan: A Quaternary and Recent Faunal Adventure*. Wayne State University Press.
- Holyoake, Carly, Hugh Finn, Nahiid Stephens, Padraig Duignan, Chandra Salgado, Holly Smith, Lars Bejder, et al. 2010. "Technical Report on the Bottlenose Dolphin (Tursiops Aduncus) Unusual Mortality Event within the Swan Canning Riverpark, June-October 2009."
- Hopton, M.E., and G.N. Cameron. 2001. "Geomys Knoxjonesi." *Mammalian Species* 672: 1–3.
- Horwell, David, and Pete Oxford. 2011. *Galapagos Wildlife*. 3rd Editio. Bradt Travel Guides.
- Houston, C. Stuart, Dwight G. Smith, and Christoph Rohner. 1998. "Great Horned Owl (Bubo Virginianus)." In *The Birds of North America Online*, edited by A. Poole.
- Hudson, W.S., and D.E. Wilson. 1986. "Macroderma Gigas." *Mammalian Species* 260: 1–4.
- Huffman, Kelly J., John Nelson, Janine Clarey, and Leah Krubitzer. 1999. "Organization of Somatosensory Cortex in Three Species of Marsupials, Dasyurus Hallucatus, Dactylopsila Trivirgata, and Monodelphis Domestica: Neural Correlats of Morphological Specializations." *The Journal of Comparative Neurology* 403: 5–32.
- Hunt, J.L., L.A. McWilliams, T.L. Best, and K.G. Smith. 2003. "Eumops Bonariensis." *Mammalian Species* 733: 1–5.
- Hunt, J.L., J.E. Morris, and T.L. Best. 2004. "Nyctomys Sumichrasti." *Mammalian Species* 754: 1–6.
- Hutton, Ian, and David Priddel. 2002. "Breeding Biology of the Black-Winged Petrel, Pterodroma Nigripennis, on Lord Howe Island." *EMU* 102 (4). CSIRO PUBLISHING: 361.
- Hwang, Y.T., and S. Lariviere. 2001. "Mephitis Macroua." *Mammalian Species* 686: 1–3.
- . 2003. "Mydaus Javanicus." *Mammalian Species* 723: 1–3.

- . 2005. "Lutrogale Perspicillata." *Mammalian Species* 786: 1–4.
- Ibrahim, Adel A., and Moustafa H. El-Naggar. 2013. "Diet and Reproductive Biology of the Starred Agama, *Laudakia Stellio* (Linnaeus, 1758) (Squamata: Agamidae), in the Northern Sinai, Egypt." *Zoology in the Middle East* 59 (2). Taylor & Francis: 136–43.
- Isberg, S R, P C Thomson, F W Nicholas, S G Barker, and C Moran. 2005. "Quantitative Analysis of Production Traits in Saltwater Crocodiles (*Crocodylus Porosus*): I. Reproduction Traits." *Journal of Animal Breeding and Genetics = Zeitschrift Für Tierzüchtung Und Züchtungsbiologie* 122 (6): 361–69.
- Itō, Yoshiaki. 1980. "Comparative Ecology." In , edited by Jiro Kikkawa, illustrate, 436. CUP Archive.
- IUCN. 1989. *Crocodiles: Their Ecology, Management, and Conservation*. International Union for Conservation of Nature and Natural Resources. Crocodile Specialist Group.
- "IUCN Red List of Threatened Species. Version 2011.1." 2011. *IUCN 2011*. [www.iucnredlist.org](http://www.iucnredlist.org).
- IUCN/SSC. 2002. "The Potential to Breed Appendix-I Reptiles in Captivity - A Preliminary Assessment." In *Eighteenth Meeting of the Animals Committee; Information Document 11*, 65. San Jose (Costa Rica): Convention on International Trade in Endangered Species of Wild Fauna and Flora.
- Iverson, John B. 1980. "The Reproductive Biology of *Gopherus Polyphemus* (Chelonia:Testudinidae)." *American Midland Naturalist* 103 (2): 353–59.
- . 2010. "Reproduction in the Red-Cheeked Mud Turtle (*Kinosternon Scorpioides Cruentatum*) in Southeastern Mexico and Belize, with Comparisons Across the Species Range." *Chelonian Conservation and Biology* 9 (2): 250–61.
- Iverson, John B., Christine P. Balgooyen, Kathy K. Byrd, and Kelly K. Lyddan. 1993. "Latitudinal Variation in Egg and Clutch Size in Turtles (Supplement)." *Canadian Journal of Zoology* 71 (12). NRC Research Press: 2448–61.
- Iwaniuk, Andrew N, and John E Nelson. 2002. "Can Endocranial Volume Be Used as an Estimate of Brain Size in Birds." *Canadian Journal of Zoology* 80: 16–23. doi:10.1139/Z01-204.
- J A McLennan, L Dew, J Miles, N Gillingham, and R Waiwai. 2004. "Size Matters: Predation Risk and Juvenile Growth in North Island Brown kiwi(*Apteryx Mantelli*)." *New Zealand Journal of Ecology* 28: 241 – 250.
- Jackson, Richard. 2005. "The Poorly Known Rusty Monitor *Varanus Semiremex*: History, Natural History, Captive Breeding and Husbandry." *Captive Breeding and Husbandry* 35 (1): 15–24.
- Jackson, Stephen M. 2012. *Gliding Mammals of the World*. CSIRO Publishing.
- James, CD. 1996. "Ecology of the Pygmy Goanna (*Varanus Brevicauda*) in Spinifex Grasslands of Central Australia." *Australian Journal of Zoology* 44 (2). CSIRO PUBLISHING: 177.

- Jass, C.N., and J.I. Mead. 2004. "Capricornis Crispus." *Mammalian Species* 750: 1–10.
- Jefferson, T.A., and L. Karczmarski. 2001. "Sousa Chinensis." *Mammalian Species* 655: 1–9.
- Jefferson, Thomas A., Marc A. Webber, and Robert L. Pitman. 2008. *Marine Mammals of the World*. First Edit. Elsevier.
- Jefimow, M. 2007. "Effects of Summer and Winter-like Acclimation on the Thermoregulatory Behavior of Fed and Fasted Desert Hamsters, Phodopus Roborovskii." *Journal of Thermal Biology* 32: 212–19.
- Jeglinski, Jana W.E., Christiane Werner, and Patrick W. Robinson. 2012. "Age, Body Mass and Environmental Variation Shape the Foraging Ontogeny of Galapagos Sea Lions." *Marine Ecology Progress Series* 453: 279–96.
- Jennings, J.B., T.L. Best, S.E. Burnett, and J.C. Rainey. 2001. "Molossus Sinaloae." *Mammalian Species* 691: 1–5.
- Jennings, J.B., T.L. Best, J.C. Rainey, and S.E. Burnett. 2000. "Molossus Pretiosus." *Mammalian Species* 635: 1–3.
- Jennings, M.R., and G.B. Rathbun. 2001. "Petrodromus Tetradactylus." *Mammalian Species* 682: 1–6.
- Jesus, J. 2012. "Evidence of High Longevity in an Island Lacertid, Teira Dugessi (Milne-Edwards, 1829). First Data on Wild Specimens." *Acta Herpetologica* 7 (2): 309–13.
- Jetz, Walter, Cagan H C.H. Sekercioglu, and Katrin Böhning-Gaese. 2008. "The Worldwide Variation in Avian Clutch Size across Species and Space." *PLoS Biology* 6 (12). Public Library of Science: e303. doi:10.1371/journal.Citation.
- Jiang, H.X. 2010. "Chinese Alligator Alligator Sinensis." In *Crocodiles. Status Survey and Conservation Action Plan.*, edited by S.C. Manolis and C. Stevenson., Third Edit, 5–9. Crocodile Specialist Group. Darwin.
- Jiménez, Sebastián, Andrés Domingo, Martín Abreu, and Alejandro Brazeiro. 2011. "Structure of the Seabird Assemblage Associated with Pelagic Longline Vessels in the Southwestern Atlantic: Implications for Bycatch." *Endangered Species Research* 15: 241–54.
- Johnsgard, Paul. 2009. *Birds of the Great Plains. Birds of the Great Plains*. Revised ed.
- . 2010. *Ducks, Geese, and Swans of the World. Ducks, Geese, and Swans of the World*.
- Johnson, M. J., III C. Van Riper, and K. M. Pearson. 2002. "Black-Throated Sparrow (Amphispiza Bilineata)." In *The Birds of North America Online*, edited by A. Poole.

- Johnson, Michele A., Jessica L. Caton, Rachel E. Cohen, Joseph R. Vandecar, and Juli Wade. 2010. "The Burden of Motherhood: The Effect of Reproductive Load on Female Lizard Locomotor, Foraging, and Social Behavior." *Ethology* 116 (12): 1217–25.
- Johnson, S.R., and R.W. Campbell. 1995. "Crested Myna (*Acridotheres Cristatellus*)." In *The Birds of North America Online*, edited by A. Poole.
- Johnson, S.R., and I.M. Cowan. 1974. "Thermal Adaptation as a Factor Affecting Colonizing Success of Introduced Sturnidae (Aves) in North America." *Canadian Journal of Zoology* 52: 1559–76.
- Jones, C. 1977. "Plecotus Rafinesquii." *Mammalian Species* 69: 1–4.
- Jones, C., and R.W. Manning. 1989. "Myotis Austroriparius." *Mammalian Species* 332: 1–3.
- Jones, Ian L. 1993. "Crested Auklet (*Aethia Cristatella*)." In *The Birds of North America Online*, edited by A. Poole.
- Jones, Ian L., Nikolai B. Konyukhov, Jeffrey C. Williams, and G. Vernon Byrd. 2001. "Parakeet Auklet (*Aethia Psittacula*)." In *The Birds of North America Online*, edited by A. Poole.
- Jones, J. Knox Jr., and Hugh H. Genoways. 1967. "A New Subspecies of the Fringe-Tailed Bat, *Myotis Thysanodes*, from the Black Hills of South Dakota and Wyoming." *Journal of Mammalogy* 48 (2): 231–35.
- Jones, J.K., and H.H. Genoways. 1973. "Ardops Nichollii." *Mammalian Species* 24: 1–2.
- Jones, J.K., and J.A. Homan. 1974. "Hylonycteris Underwoodi." *Mammalian Species* 32: 1–2.
- Jones, Kate E., Jon Bielby, Marcel Cardillo, Susanne a. Fritz, Justin O'Dell, C. David L. Orme, Kamran Safi, et al. 2009. "PanTHERIA: A Species-Level Database of Life History, Ecology, and Geography of Extant and Recently Extinct Mammals." Edited by W. K. Michener. *Ecology* 90 (9): 2648–2648. doi:10.1890/08-1494.1.
- Jones, M.E., R.K. Rose, and S. Burnett. 2001. "Dasyurus Maculatus." *Mammalian Species* 676: 1–9.
- Jones, Menna, Chris R. Dickman, and Michael Mike Archer. 2003. *Predators with Pouches: The Biology of Carnivorous Marsupials*. CSIRO Publishing.
- Jouventin, Pierre, and F Stephen Dobson. 2002. "Why Breed Every Other Year? The Case of Albatrosses." *Proceedings. Biological Sciences / The Royal Society* 269 (1503): 1955–61. doi:10.1098/rspb.2002.2080.
- Julien, J. R., G. Gauthier, R. I. G. Morrison, and J. Bêty. 2013. "Survival Rate of the Long-Tailed Jaeger at Alert, Ellesmere Island, Nunavut." *The Condor* 115 (3). Cooper Ornithological Society: 543–50.
- Justo, E.R., L.J.M. De Santis, and M.S. Kin. 2003. "Ctenomys Talarum." *Mammalian Species* 730: 1–5.

- Juvik, James O., Duane E. Meier, and Sean McKeown. 1991. "Captive Husbandry and Conservation of the Madagascar Ploughshare Tortoise, *Geochelone Yniphora*." In *Proceedings of the First International Symposium on Turtles & Tortoises: Conservation and Captive Husbandry*, 127–37.
- Kalcounis-Rueppell, M.C., and T.R. Spoon. 2009. "Peromyscus Boylii." *Mammalian Species* 838: 1–14.
- Kawamichi, T. 2010. "Biannual Reproductive Cycles in the Japanese Giant Flying Squirrel (*Petaurista Leucogenys*)." *Journal of Mammalogy* 91: 905–13.
- Kays, Roland W., and Don Wilson. 2009. *Mammals of North America*. Second Edi. Princeton University Press.
- Kear, Janet, and (Ed.). 2005. *Ducks, Geese and Swans: Species Accounts (Cairina to Mergus)*. Edited by Janet Kear. reprint. Oxford University Press.
- Keddy-Hector, D.P. 2000. "Aplomado Falcon (*Falco Femoralis*)." In *The Birds of North America Online*, edited by A. Poole.
- Kemper, Catherine M., Steven J. B. Cooper, Graham C. Medlin, Mark Adams, David Stemmer, Kathleen M. Saint, Matthew C. McDowell, and Jeremy J. Austin. 2011. "Cryptic Grey-Bellied Dunnart (*Sminthopsis Griseoventer*) Discovered in South Australia: Genetic, Morphological and Subfossil Analyses Show the Value of Collecting Voucher Material." *Australian Journal of Zoology* 59 (3). CSIRO PUBLISHING: 127.
- Khadka, Madhav, Hemanta Kafley, and Bishnu Prasad Thapaliya. 2008. "Population Status and Distrubion of Gharial (*Gavialis Gangeticus*) in Nepal."
- Khan, Jameel J, Jean M L Richardson, and Glenn J Tattersall. 2010. "Thermoregulation and Aggregation in Neonatal Bearded Dragons (*Pogona Vitticeps*)." *Physiology & Behavior* 100 (2): 180–86.
- King, D., and B. Green. 1999. *Monitors: The Biology of Varanid Lizards*.
- King, D.R., and E.R. Pianka. 2007. "Ecology of the Pygmy Monitor, *Varanus Brevicauda*, in Western Australia." *Mertensiella* 17 (3): 304–11.
- Kingdon, Jonathan, David Happold, Thomas Butynski, Michael Hoffmann, Meredith Happold, and Jan Kalina. 2013. *Mammals of Africa, Volumes 1-6*. A&C Black.
- Kirwan, Guy, Barbaros Demirci, Hilary Welch, Kerem Boyla, Metehan Özen, Peter Castell, and Tim Marlow. 2009. *The Birds of Turkey*. illustrate. A&C Black.
- Klima, J., and J.R. Jehl Jr. 1998. "Stilt Sandpiper (*Calidris Himantopus*)." In *The Birds of North America Online*, edited by A. Poole.
- Knowles Kerry, Judith Clarke, and Grant Else. 1993. "The Use of an Automated Weighing and Recording System for the Study of the Biology of Adelie Penguins (*Pygoscelis Adeliae*)." *Proc. NIPR Symp. Polar Biol.* 6: 62–75.

- Koch, A., M. Gaulke, and W. Böhme. 2010. "Unravelling the Underestimated Diversity of Philippine Water Monitor Lizards (Squamata: Varanus Salvator Complex), with the Description of Two New Species and a New Subspecies." *Zootaxa* 2446: 1–54.
- Kochert, M. N., K. Steenhof, C. L. McIntyre, and E. H. Craig. 2002. "Golden Eagle (*Aquila Chrysaetos*)." In *The Birds of North America Online*, edited by A. Poole.
- Koehler, Catherine E., and Robert M. R. Barclay. 2000. "POST-NATAL GROWTH AND BREEDING BIOLOGY OF THE HOARY BAT (*LASIURUS CINEREUS*)." *Journal of Mammalogy* 81 (1): 234–44.
- Kofron, Christopher P., and Charles Steiner. 1994. "Observations on the African Dwarf Crocodile, *Osteolaemus Tetraspis*." *Copeia* 1994 (2): 533–35.
- Komar, Carolyn M., Frances Zacharachis-jutz, Chris J. Cretokos, Richard R. Behringer, and John J. IV Rasweiler. 2007. "Polarized Ovaries of the Long-Tongued Bat, *Glossophaga Soricina*: A Novel Model for Studying Ovarian Development, Folliculogenesis, and Ovulation." *The Anatomical Record* 290 (11): 1439–48.
- Kot, Brian Chin Wing. 2010. "Assessment of the Anatomy and Physiology of the Thyroid Gland of the Indo-Pacific Bottlenose Dolphin, *Tursiops Aduncus*, Using Ultrasonography". The Hong Kong Polytechnic University.
- Kratochvíl, L., and D. Frynta. 2006. "Egg Shape and Size Allometry in Geckos (Squamata: Gekkota), Lizards with Contrasting Eggshell Structure: Why Lay Spherical Eggs?" *Journal of Zoological Systematics and Evolutionary Research* 44 (3): 217–22. doi:10.1111/j.1439-0469.2005.00339.x.
- Kratochvíl, Lukáš, and Daniel Frynta. 2006. "Body-Size Effect on Egg Size in Eublepharid Geckos (Squamata: Eublepharidae), Lizards with Invariant Clutch Size: Negative Allometry for Egg Size in Ectotherms Is Not Universal." *Biological Journal of the Linnean Society* 88 (4): 527–32.
- Kratochvíl, Lukáš, and Lukáš Kubička. 2007. "Why Reduce Clutch Size to One or Two Eggs? Reproductive Allometries Reveal Different Evolutionary Causes of Invariant Clutch Size in Lizards." *Functional Ecology* 21 (1): 171–77. doi:10.1111/j.1365-2435.2006.01202.x.
- Krausman, P.R., and A.L. Casey. 2007. "Addax *Nasomaculatus*." *Mammalian Species* 807: 1–4.
- Krist, Milos. 2009. "Short- and Long-Term Effects of Egg Size and Feeding Frequency on Offspring Quality in the Collared Flycatcher (*Ficedula Albicollis*)." *The Journal of Animal Ecology* 78 (5): 907–18.
- Krist, Miloš. 2011. "Egg Size and Offspring Quality: A Meta-Analysis in Birds." *Biological Reviews of the Cambridge Philosophical Society* 86 (3): 692–716.
- Kruger, Tamara Lauren. 2010. "Long Term Prospects for the Persistence of Breeding Verreaux's Eagles (*Aquila Verreauxii*) at the Walter Sisulu National Botanical Garden, Johannesburg". University of the Witwatersrand.
- Kunz, T.H., and D.P. Jones. 2000. "Pteropus Vampyrus." *Mammalian Species* 642: 1–6.



- Kunz, Thomas H., and M. Brock Fenton. 2006. *Bat Ecology*. Edited by Thomas H. Kunz and M. Brock Fenton. University of Chicago Press.
- Kuo, Chih-Horng, and Fredric J. Janzen. 2004. "Genetic Effects of a Persistent Bottleneck on a Natural Population of Ornate Box Turtles (*Terrapene Ornata*)."  
*Conservation Genetics* 5 (4): 425–37.
- Kurucz, Nina. 2000. "The Nesting Biology of the Red-Tailed Black Cockatoo (*Calyptorhynchus Banksii* *Macrorhynchus*) and Its Management Implications in the Top End of Australia". Northern Territory University.
- Kushlan, James A., and Frank J. Mazzotti. 1989. "Population Biology of the American Crocodile." *Journal of Herpetology* 23 (1): 7–21.
- Lacey, E.A., and L.A. Ebersperger. 2007. *Social Structure in Octodontid and Ctenomyid Rodents*. Edited by JO Wolff and PW Sherman. *Rodent Societies: An Ecological and Evolutionary Perspective*.
- Lambert, Cathy, Glen Gaikhorst, and Phillip Matson. 2011. "Captive Breeding of the Sandhill Dunnart, *Sminthopsis Psammophila* (Marsupialia: Dasyuridae): Reproduction, Husbandry and Growth and Development." *Australian Mammalogy* 33 (1). CSIRO PUBLISHING: 21.
- Lambertucci, S. A., A. Trejo, S. Di Martino, J. A. Sanchez-Zapata, J. A. Donazar, and F. Hiraldo. 2009. "Spatial and Temporal Patterns in the Diet of the Andean Condor: Ecological Replacement of Native Fauna by Exotic Species." *Animal Conservation* 12 (4): 338–45.
- Lambio, Angel Laylo. 2010. *Poultry Production in the Tropics*. UP Press.
- Lancaster, Douglas A. 1964. "Biology of the Brushland Tinamou, *Nothoprocta Cinerascens*. Bulletin of the AMNH ; v. 127, Article 6". New York : [American Museum of Natural History].
- Lance, V.A. 1989. "Reproductive Cycle of the American Alligator." *American Zoologist* 29 (3): 999–1018.
- Lance, Valentine A. 2003. "Alligator Physiology and Life History: The Importance of Temperature." *Experimental Gerontology* 38 (7): 801–5.
- Lane, Erin Katherine. 2013. "Sexual Selection of Beard Color in the Inland Bearded Dragon (*Pogona Vitticeps*)". California State University, San Marcos.
- Lanicci, Rachael. *Garden Secrets for Attracting Birds*. Creative Homeowner.
- Lanser, Amanda. 2013. *Boa Constrictor*. ABDO Publishing Company.
- Lariviere, S. 2001a. "Aonyx Capensis." *Mammalian Species* 671: 1–6.
- . 2001b. "Aonyx Congicus." *Mammalian Species* 650: 1–3.
- . 2001c. "Ursus Americanus." *Mammalian Species* 647: 1–11.

- . 2002. "Lutra Maculicollis." *Mammalian Species* 712: 1–6.
- . 2003. "Amblonyx Cinereus." *Mammalian Species* 720: 1–5.
- Lariviere, S., and J. Calzada. 2001. "Genetta Genetta." *Mammalian Species* 680: 1–6.
- Lariviere, S., and P.J. Seddon. 2001. "Vulpes Rueppelli." *Mammalian Species*.
- Latta, Steven, Christopher Rimmer, Allan Keith, James Wiley, Herbert A. Raffaele, Kent McFarland, and Eladio Fernandez. 2010. *Birds of the Dominican Republic and Haiti*. Princeton University Press.
- Lavers, Jennifer, Mark Hipfner, Gilles Chapdelaine, and J. Mark Hipfner. 2009. "Razorbill (Alca Torda)." In *The Birds of North America Online*, edited by A. Poole.
- Lawlor, T.E. 1982. "Ototylomys Phyllotis." *Mammalian Species* 181: 1–3.
- Lecky, James H. 2011. "DRAFT Environmental Assessment for Issuance of Four Scientific Research Permits for Cetacean Studies". Silver Spring, MD.
- Lee, Pei-Fen, and Chien-Yu Liao. 1998. "Species Richness Patterns and Research Trend of Flying Squirrel." *Journal of Taiwan Museum* 51: 1–20.
- Lee, T.E., and D.J. Dominguez. 2000. "Ametrida Centurio." *Mammalian Species* 640: 1–4.
- Lee, T.E., J.B. Scott, and M.M. Marcum. 2001. "Vampyressa Bidens." *Mammalian Species* 684: 1–3.
- Leiner, Natalia O., Eleonore Z. F. Setz, and Wesley R. Silva. 2008. "Semelparity and Factors Affecting the Reproductive Activity of the Brazilian Slender Opossum (Marmosops Paulensis) in Southeastern Brazil." *Journal of Mammalogy* 89 (1): 153–58.
- Lelièvre, Hervé, Maxime Le Hénanff, Gabriel Blouin-Demers, Guy Naulleau, and Olivier Lourdais. 2010. "Thermal Strategies and Energetics in Two Sympatric Colubrid Snakes with Contrasted Exposure." *Journal of Comparative Physiology. B, Biochemical, Systemic, and Environmental Physiology* 180 (3): 415–25.
- Lemm, Jeff. 2012. "The Spiny-Tailed Monitor (Varanus Acanthurus)."
- Leon, L., T.C. Monterrubio, and M.S. Hafner. 2001. "Cratogeomys Neglectus." *Mammalian Species* 685: 1–4.
- Leshem, Adah, Amos Ar, and Ralph A. Ackerman. 1991. "Growth, Water, and Energy Metabolism of the Soft-Shell Turtle (Trionyx Triunguis) Embryo: Effects of Temperature." *Physiological Zoology* 64 (2): 568–94.
- Leslie, D.M. 2010a. "Procapra Picticaudata." *Mammalian Species* 861: 138–48.
- . 2010b. "Przewalskium Albirostre." *Mammalian Species* 849: 7–18.

- Leslie, D.M., and G.B. Schaller. 2009. "Bos Grunniens and Bos Mutus." *Mammalian Species* 836: 1–17.
- Leslie Jr., D.M. 2011. "Rusa Unicorn." *Mammalian Species* 871: 1–30.
- Leslie Jr., D.M., C.P. Groves, and A.V. Abramov. 2010. "Procrapra Przewalskii." *Mammalian Species* 860: 124–37.
- Leslie Jr., D.M., and K. Sharma. 2009. "Tetracerus Quadricornis." *Mammalian Species* 843: 1–11.
- Li, Norman T-L., and Peter K.L. Ng. 2010. "Population Assessment Methods for the Sunda Colugo Galeopterus Variegatus (Mammalia: Dermoptera) in Tropical Forests and Their Viability in Singapore." *The Raffles Bulletin of Zoology* 58 (1): 157–64.
- Libertini, G. 2012. "Phenoptosis, Another Specialized Neologism, or the Mark of a Widespread Revolution?" *Biochemistry. Biokhimiia* 77 (7): 795–98.
- Lickel, Laura Evelyn. 2010. "Intake, Apparent Digestibility, and Digesta Passage in Leopard Tortoises (Geochelone Pardalis) Fed a Complete, Extruded Feed". Californai Polytechnic State University.
- Lindsey, G.D.E., E.A. Vanderwerf, H. Baker, and P.E. Baker. 1998. "Kaua'i Amakihi (Hemignathus Kuaiensis)." In *The Birds of North America Online*, edited by A. Poole.
- Linzey, D.W., and R.L. Packard. 1977. "Ochrotomys Nuttalli." *Mammalian Species* 75: 1–6.
- Lislevand, T, J Figuerola, and T Székely. 2009. "Evolution of Sexual Size Dimorphism in Grouse and Allies (Aves: Phasianidae) in Relation to Mating Competition, Fecundity Demands and Resource Division." *Journal of Evolutionary Biology* 22 (9): 1895–1905. doi:10.1111/j.1420-9101.2009.01802.x.
- Litzgus, Jacqueline D., and Timothy A. Mousseau. 2003. "Multiple Clutching in Southern Spotted Turtles, Clemmys Guttata." *Journal of Herpetology* 37 (1). The Society for the Study of Amphibians and Reptiles: 17–23.
- Lowther, P.E., D.E. Kroodsmas, and G.H. Farley. 2000. "Rock Wren (Salpinctes Obsoletus)." In *The Birds of North America Online*, edited by A. Poole.
- Lowther, P.E., and D.F. Stotz. 1999. "Sulpher-Bellied Flycatcher (Myiodynastes Luteiventris)." In *The Birds of North America Online*, edited by A. Poole.
- Luiselli, Luca, Francesco M. Angelici, and Godfrey C. Akani. 2000. "Large Elapids and Arboreality: The Ecology of Jameson's Green Mamba (Dendroaspis Jamesoni) in an Afrotropical Forested Region." *Contributions to Zoology* 69 (3).
- Luiselli, Luca, and Tomas Diagne. 2013. "Kinixys Homeana Bell 1827 - Home's Hinge-Back Tortoise." In *Conservation Biology of Freshwater Turtles and Tortoises: A Compilation Project of the IUCN/SSC Tortoise and Freshwater Turtle Specialist Group*, 070.1–070.10.

- Lunney, Daniel, Pat Hutchings, and Dieter Hochuli. 2009. *The Natural History of Sydney*. Royal Zoological Society of New South Wales.
- Luque, Sebastian. 2009. "Maternal and Pup Growth Strategies of Sympatric Antarctic and Subantarctic Fur Seals at Ile de La Possession, Iles Crozet, Southern Indian Ocean". Memorial University.
- Lurz, P.W.W., J. Gurnell, and L. Magris. 2005. "Sciurus Vulgaris." *Mammalian Species* 769: 1–10.
- Lutmerding, J.A., and A.S. Love. 2013. "Longevity Records of North American Birds". Laurel MD.
- Lyon, Bruce E., Robert D. Montgomerie, and Linda D. Hamilton. 1987. "Male Parental Care and Monogamy in Snow Buntings." *Behav Ecol Sociobiol* 20: 377–82.
- Lyons, Jessica A. 2012. "Smuggling Snakes: A Study on the Global Trade of Green Pythons (*Morelia Viridis*)". University of New South Wales.
- MacCulloch, Ross D., Amy Lathrop, Philippe J. R. Kok, Raffael Ernst, and Michelle Kalamandeen. 2009. "The Genus *Oxyrhopus* (Serpentes: Dipsadidae: Xenodontinae) in Guyana: Morphology, Distributions and Comments on Taxonomy." *Papéis Avulsos de Zoologia (São Paulo)* 49 (36). Museu de Zoologia da Universidade de São Paulo: 487–95.
- MacDonald, S.O., and C. Jones. 1987. "Ochotona Collaris." *Mammalian Species* 281: 1–4.
- Macip-Rios, Rodrigo, Mauricio Fernandez-Aguilar, Gabriel Barrios-Quiroz, and Gustavo Casas-Andreu. 2012. "Indirect Morphological Measures to Infer Body Size in a Wild Population of the Chiapas Spectacled Caiman, Caiman Crocodilus Chiapasius (Bocourt, 1876)." *Herpetological Conservation and Biology* 7 (3): 367–75.
- Macnab, Brian K. 2005. "Uniformity in the Basal Metabolic Rate of Marsupials: Its Causes and Consequences." *Revista Chilena de Historia Natural* 78 (2). Sociedad de Biología de Chile: 183–98.
- MacSwiney, M.C.G., S. Hernandez-Betancourt, and R. Avila-Flores. 2009. "Otonyctomys Hatti." *Mammalian Species* 825: 1–5.
- Madsen, T., and R. Shine. 1993. "Male Mating Success and Body Size in European Grass Snakes." *Copeia* 2: 561–64.
- Magnusson, William E., and Albertina P. Lima. 1991. "The Ecology of a Cryptic Predator, *Paleosuchus Trigonatus*, in a Tropical Rainforest." *Journal of Herpetology* 25 (1): 41–48.
- Magnusson, William E., and Tânia M. Sanaiotti. 1995. "Growth of Caiman *Crocodilus* in Central Amazonia, Brazil." *Copeia* 1995 (2): 498–501.
- Mair, Lyn, and Lynnath Beckley. 2012. *Seychelles: The Bradt Travel Guide*. illustrate. Bradt Travel Guides.
- Male, T.D., S.G. Fancy, and C.J. Ralph. 1998. "Red-Billed Leiothrix." In *The Birds of North America Online*, edited by A. Poole.

- Mallory, M L, K A Allard, B M Braune, H G Gilchrist, and V G Thomas. 2012. "New Longevity Record for Ivory Gulls ( *Pagophila Eburnea* ) and Evidence of Natal Philopatry." *ARCTIC* 65 (1): 98–101.
- Mancina, C.A. 2005. "Pteronotus Macleayii." *Mammalian Species* 778: 1–3.
- . 2010. "Phyllonycteris Poeyi." *Mammalian Species* 852: 41–48.
- Mancina, Carlos A., Rafael Borroto-Paez, and Lainet Garcia-Rivera. 2004. "Relative Brain Size in Cuban Bats." *Orsis: Organismes I Sistemes* 19: 7–19.
- Manik, Hotlan. 2011. "Modifikasi Penetasan Telur Burung Maleo Gunung (*Aepyodius Arfakianus*) Untuk Meningkatkan Daya Teta". Universitas Gadjah Mada.
- Manson, Katrina, and James Knight. 2011. *Burkina Faso Bradt*. Bradt Travel Guides.
- Mantooth, S.J., and T.L. Best. 2005. "Chaetodipus Eremicus." *Mammalian Species* 768: 1–3.
- Mares, Michael A., Kristina A. Ernest, and Donald D. Gettinger. 1986. "Small Mammal Community Structure and Composition in the Cerrado Province of Central Brazil." *Journal of Tropical Ecology* 2: 289–300.
- Margalida, Antoni, Beatriz E. Arroyo, Gary R. Bortolotti, and Joan Bertran. 2006. "Prolonged Incubation in Raptors: Adaptive or Nonadaptive Behavior?" *Journal of Raptor Research* 40 (2). The Raptor Research Foundation: 159–63.
- Margalida, Antoni, Luis Mariano González, Roberto Sánchez, Javier Oria, Luis Prada, Javier Caldera, Antonio Aranda, and José Ignacio Molina. 2007. "A Long-Term Large-Scale Study of the Breeding Biology of the Spanish Imperial Eagle (*Aquila Adalberti*)." *Journal of Ornithology* 148 (3): 309–22.
- Marinho-Filho, Jader, Flavio H.G. Rodrigues, and Keila M. Juarez. 2002. "The Cerrado Mammals: Diversity, Ecology, and Natural History." In *The Cerrados of Brazil: Ecology and Natural History of a Neotropical Savanna*, edited by Paulo S. Oliveira and Robert J. Marquis, 424.
- Marjorie, Kathleen Calf Tjørve. 1975. "From an Egg to a Fledgling: A Perspective on Shorebird Breeding Ecology and Chick Energetics". University of Cape Town.
- Markowitz, Wendy Jane. 2012. "Comparative Socioecology of the Dusky Dolphin (*Lagenorhynchus Obscurus*) in New Zealand". Massey University, Manawatu.
- Marks, J. S., D. L. Evans, and D. W. Holt. 1994. "Long-Eared Owl (*Asio Otus*)." In *The Birds of North America Online*, edited by A. Poole.
- Marquez-M., Rene. 1994. "Synopsis of Biological Data on the Kemp ' S Ridley Turtle , *Lepidochelys Kempii* ( Garman , 1880 )."
- Marshall, L.G. 1978a. "Dromicops Australis." *Mammalian Species* 99: 1–5.

- . 1978b. "Lutreolina Crassicaudata." *Mammalian Species* 91: 1–4.
- Martin, John W., and Barbara A. Carlson. 1998. "Sage Sparrow (*Artemisospiza Belli*)." In *The Birds of North America Online*, edited by A. Poole.
- Martin, T.E. 1995. "Avian Life History Evolution in Relation to Nest Sites, Nest Predation, and Food." *Ecological Monographs* 65 (1). Eco Soc America: 101–27.
- Masin, Simone, Anna Bonardi, Emilio Padoa-Schioppa, Luciana Bottoni, and Gentile Francesco Ficetola. 2014. "Risk of Invasion by Frequently Traded Freshwater Turtles." *Biological Invasions* 16 (1): 217–31.
- Mathew, Abraham, M. Ganesan, Rozwan A. Majid, and Claire Beastall. 2011. "Breeding of False Gharial, *Tomistoma Schlegelii*, at Zoo Negara, Malaysia." *Zoo Negara*.
- Matson, J.O., and T.J. McCarthy. 2004. "Sturnira Mordax." *Mammalian Species* 755: 1–3.
- Mattison, C. 1989. *Lizards of the World*.
- Mbatchou, V.C., J. Sackey, and I. Sackey. 2011. "Proximate and Chemical Compositions of Leaf Samples of *Burkea Africana* from Mole National Park, Ghana." *Canadian Journal of Pure & Applied Sciences* 5 (2): 1493–1500.
- McCann, Mary Jean. 2011. "Burrow Characteristics and Social Elements of Captive Juvenile Bolson Tortoises (*Gopherus Flavomarginatus*) within a Headstart Enclosure in New Mexico". New Mexico State University.
- McCarty, J.P. 1996. "Eastern Wood-Pewee (*Contopus Virens*)." In *The Birds of North America Online*, edited by A. Poole.
- McCay, T.S. 2001. "Blarina Carolinensis." *Mammalian Species* 673: 1–7.
- McClellan, D.A., and D.S. Rogers. 1997. "Peromyscus Zarhynchus." *Mammalian Species* 562: 1–3.
- McClung, Maureen R., Philip J. Seddon, M. Massaro, and A.N. Setiawan. 2004. "Nature-Based Tourism Impacts on Yellow-Eyed Penguins *Megadyptes Antipodes*: Does Unregulated Visitor Access Affect Fledging Weight and Juvenile Survival?" *Biological Conservation* 119 (2): 279–85.
- McCormack, J. E., and Jerram L. Brown. 2008. "Mexican Jay (*Aphelocoma Wollweberi*)." In *The Birds of North America Online*, edited by A. Poole.
- McFarlane, Donald A, and Kimball L. Garrett. 1989. "The Prey of Common Barn-Owls (*Tyto Alba*) in Dry Limestone Scrub Forest of Southern Jamaica." *Caribbean Journal of Science* 25 (1-2): 21–23.
- McGhee, M.E., and H.H. Genoways. 1978. "Liomys Pictus." *Mammalian Species* 83: 1–5.
- McGregor, Richard C. 1909. *A Manual of Philippine Birds*. Manila: Bureau of Printing.

- McGrew, J.C. 1979. "Vulpes Macrotis." *Mammalian Species* 123: 1–6.
- Mclean, J.A., and J.R. Speakman. 1999. "Energy Budgets of Lactating and Non-Reproductive Brown Long-Eared Bats (*Plecotus Auritus*) Suggest Females Use Compensation in Lactation." *Functional Ecology* 13 (3): 360–72.
- Medina, Félix M., Paulo Oliveira, Dilia Menezes, Sérgio Teixeira, Rafael García, and Manuel Nogales. 2010. "Trophic Habits of Feral Cats in the High Mountain Shrublands of the Macaronesian Islands (NW Africa, Atlantic Ocean)." *Acta Theriologica* 55 (3): 241–50.
- Megysi, Jennifer L., and Donna L. O'Daniel. 1997. "Bulwer's Petrel (*Bulweria Bulwerii*)." In *The Birds of North America Online*, edited by A. Poole.
- Meiri, S. 2007. "Size Evolution in Island Lizards." *Global Ecology and Biogeography* 16: 702–8.
- . 2010. "Length-Weight Allometries in Lizards." *Journal of Zoology* 281 (February): 218–26. doi:10.1111/j.1469-7998.2010.00696.x.
- Meiri, Shai, James H. Brown, and Richard M. Sibly. 2011. "The Ecology of Lizard Reproductive Output." *Global Ecology and Biogeography* 21 (5): 592–602. doi:10.1111/j.1466-8238.2011.00700.x.
- Melo, Osana Prado, Renata Maria Arruda Ramos, and Ana Paula Madeira Di Benedetto. 2006. "Helminths of the Marine Tucuxi, *Sotalia Fluviatilis* (Gervais, 1853)(Cetacea:Delphinidae), in Northern Rio de Janeiro State, Brazil." *Brazilian Archives of Biology and Technology* 49 (1): 145–48.
- Mendyk, Robert W. 2011. "Reproduction of Varanid Lizards (Reptilia: Squamata: Varanidae) at the Bronx Zoo." *Zoo Biology* 16 (May): 1–16. doi:10.1002/zoo.20389.
- Meng, Wei Zhi, Xiao Bing Wu, and Lu Sheng Wu. 2008. "An Investigation of the Morphometric Characteristics of Eggs of the Chinese Alligator (*Alligator Sinensis*)." *Asiatic Herpetological Research* 11: 80–84.
- Merritt, Joseph F. 2010. *The Biology of Small Mammals*. JHU Press.
- Meshaka, Walter E. Jr. 2011. "A Runaway Train in the Making: The Exotic Amphibians, Reptiles, Turtles, and Crocodilians of Florida." *Herpetological Conservation & Biology* 6 (1): 101.
- Meyers, P., R. Espinosa, C.S. Parr, T. Jones, G.S. Hammond, and T.A. Dewey. 2009. "Animal Diversity Web (On-Line)." <http://animaldiversity.org>.
- Meylan, Anne B., and Marydele Donnelly. 1999. "Status Justification for Listing the Hawksbill Turtle (*Eretmochelys Imbricata*) as Critically Endangered on the 1996 IUCN Red List of Threatened Animals." *Chelonian Conservation and Biology* 3 (2): 200–224.
- Michael, Damian, and David Lindenmayer. 2010. *Reptiles of the NSW Murray Catchment: A Guide to Their Identification, Ecology and Conservation*. CSIRO Publishing.

- Miller, Karl E., and Kenneth D. Meyer. 2002. "Short-Tailed Hawk (*Buteo Brachyurus*)." In *The Birds of North America Online*, edited by A. Poole.
- Miskelly, Colin M., Kath J Walker, and Graeme P Elliott. 2006. "Breeding Ecology of Three Subantarctic Snipes ( Genus *Coenocorypha* )" 53: 361–74.
- MobileReference. 2009. *The Illustrated Encyclopedia of North American Reptiles and Amphibians: An Essential Guide to Reptiles and Amphibians of USA, Canada, and Mexico*. MobileReference.
- Modha, M. L. 1967. "The Ecology of the Nile Crocodile (*Crocodylus Niloticus Laurenti*) on Central Island, Lake Rudolf." *African Journal of Ecology* 5 (1): 74–95.
- Moldovan, Daniel. 2008. "Husbandry and Captive Reproduction of *Varanus (Odatria) Similis*, Mertens, 1958." *Biawak* 2 (2): 89–94.
- Molinari, J., and P.J. Soriano. 1987. "Sturnira Bidens." *Mammalian Species* 276: 1–4.
- Moll, Edward O., Kalyar Platt, Steven G. Platt, Peter Praschag, and Peter Paul van Dijk. 2009. "Batagur Baska (Gray 1830) - Northern River Terrapin." *Conservation Biology of Freshwater Turtles and Tortoises: A Compilation Project of the IUCNISCC Tortoise and Freshwater Turtle Specialist Group* 5: 037.1–037.10.
- Moller, Luciana M. 2012. "Sociogenetic Structure, Kin Associations and Bonding in Delphinids." *Molecular Ecology* 21 (3): 745–64. doi:10.1111/j.1365-294X.2011.05405.x.
- Monakhov, V.G. 2011. "Martes Zibellina." *Mammalian Species* 876: 75–86.
- Monros, Juan S., Eduardo J. Belda, and Emilio Barba. 2002. "Post-Fledging Survival of Individual Great Tits: The Effect of Hatching Date and Fledging Mass." *Oikos* 99 (3): 481–88.
- Montana Field Guide. "Western Small-Footed Myotis - *Myotis Ciliolabrum*." *Montana Field Guide. Montana Natural Heritage Program and Montana Fish, Wildlife and Parks*. [http://fieldguide.mt.gov/detail\\_AMACCO1140.aspx](http://fieldguide.mt.gov/detail_AMACCO1140.aspx).
- Montevocchi, William A., and Iain J. Stenhouse. 2002. "Dovekie (*Alle Alle*)." In *The Birds of North America Online*, edited by A. Poole.
- Moore, Peter J., Eric J. Larsen, Matt Charteris, and Moira Pryde. 2012. "Southern Royal Albatross on Campbell Island/Motu Ihupuku."
- Morais, Julia Braga. 2013. "Ultrasonographic Assessment of Reproductive Diseases in Gorillas and Other Captive Great Apes". Universidade Tecnica De Lisboa.
- Morin, Marie P., Sheila Conant, and Patrick Conant. 1997. "Laysan and Nihoa Millerbird (*Acrocephalus Familiaris*)." In *The Birds of North America Online*, edited by A. Poole.



- Morrill, Benson H. 2011. "Quantitative Genetic Analysis of Reproduction Traits in Ball Pythons". Utah State University.
- Morrison, Kyle W., J. Mark Hipfner, Carina Gjerdrum, and David J. Green. 2009. "Wing Length and Mass at Fledging Predict Local Juvenile Survival and Age at First Return in Tufted Puffins." *The Condor* 111 (3): 433–41.
- Mortola, Jacopo P. 2009. "Gas Exchange in Avian Embryos and Hatchlings." *Comparative Biochemistry and Physiology. Part A, Molecular & Integrative Physiology* 153 (4): 359–77.
- Moskoff, W. 2002. "Green Kingfisher (*Chloroceryle Americana*)." In *The Birds of North America Online*, edited by A. Poole.
- Mougin, J.-L., Chr. Jouanin, F. Roux, and F. Zino. 2000. "Fledging Weight and Juvenile Survival of Cory's Shearwaters *Calonectris Diomedea* on Selvagem Grande." *Ringing & Migration* 20 (2). Taylor & Francis: 107–10.
- Mountain, Mary-Jane. 1991. "Highland New Guinea Hunter-Gatherers: The Evidence of Nombe Rockshelter, Simbu with Emphasis on the Pleistocene". Australian National University.
- Muheebwa, Jimmy, Achilles Byaruhanga, Derek Pomeroy, and Paul Mafabi. 2012. "Towards the Completion of the Grey Crowned Crane Species Action Plan for Uganda". Kampala, Uganda.
- Munshi-South, Jason, and Gerald S G.S. Gerald S Wilkinson. 2010. "Bats and Birds: Exceptional Longevity despite High Metabolic Rates." *Ageing Research Reviews* 9 (1). Elsevier: 12–19. doi:10.1016/j.arr.2009.07.006.
- Murphy, Sinead, Trevor R. Spradlin, Beth Mackey, Jill McVee, Evgenia Androukaki, Eleni Tounta, Alexandros A. Karamanlidis, et al. 2012. "Age Estimation, Growth and Age-Related Mortality of Mediterranean Monk Seals *Monachus Monachus*." *Endangered Species Research* 16: 149–63.
- Murphy, Troy G., Vanya G. Rohwer, and Edwin Scholes. 2010. "Breeding Biology and Longevity of Russet-Crowned Motmots in Central Mexico." *Journal of Field Ornithology* 81 (1): 13–16.
- Murray, Kevin L., and Theodore H. Fleming. 2008. "Social Structure and Mating System of the Buffy Flower Bat, *Erophylla Sezekorni* (Chiroptera, Phyllostomidae)." *Journal of Mammalogy* 89 (6): 1391–1400.
- Naef-Daenzer, Beat, Fritz Widmer, and Maria Nuber. 2001. "Differential Post-Fledging Survival of Great and Coal Tits in Relation to Their Condition and Fledging Date." *Journal of Animal Ecology* 70 (5): 730–38.
- Nagorsen, David W. 1993. *Bats of British Columbia*. UBC Press.
- Najafi, Negin Nourani, Esmail Kahrom, and Mahmoud Karami. 2012. "Preliminary Survey of the Breeding Biology of the Purple Swampphen *Porphyrio Porphyrio* in Anzali Wetland, Southwest Caspian Sea." *Podoces* 7 (1/2): 9–15.

- Naranjo, Luis G. 1986. "Aspects of the Biology of the Horned Screamer in Southwestern Colombia." *The Wilson Bulletin* 98 (2): 243–56.
- Nash, D.J., and R.N. Seaman. 1977. "Sciurus Aberti." *Mammalian Species* 80: 1–5.
- Naughton, Donna. 2012. *The Natural History of Canadian Mammals*. University of Toronto Press.
- Navarrete, D., and J. Ortega. 2011. "Tamandua Mexicana." *Mammalian Species* 874: 56–63.
- Navarro, D., and D.E. Wilson. 1982. "Vampyrum Spectrum." *Mammalian Species* 184: 1–4.
- Nelson, S. Kim. 1997. "Marbled Murrelet (Brachyramphus Marmoratus)." In *The Birds of North America Online*, edited by A. Poole.
- Newton, Ian. 2011. "Migration within the Annual Cycle: Species, Sex and Age Differences." *Journal of Ornithology* 152 (S1): 169–85.
- Noble, D. W. A., J. S. Keogh, and M. J. Whiting. 2013. "Multiple Mating in a Lizard Increases Fecundity but Provides No Evidence for Genetic Benefits." *Behavioral Ecology* 24 (5): 1128–37.
- Noguez, Alicia Arriaga, and Aurelio Ramirez-Bautista. 2008. "A Checklist of Reptiles from the Parque Nacional Isla Contoy, Mexico." *Bol. Soc. Herpetol. Mex.* 16 (2): 36–40.
- Norberg, Ulla M., Thomas H. Kunz, John F. Steffensen, York Winter, and Otto Von Helversen. 1993. "The Cost of Hovering and Forward Flight in a Nectar-Feeding Bat, Glossophaga Soricina, Estimated from Aerodynamic Theory." *Journal of Experimental Biology* 182 (1): 207–27.
- Noureen, Uzma. 2009. "Freshwater Turtles of Pakistan: Illegal Trade in Sindh: Preliminary Findings of Trade in Freshwater Turtle Parts."
- Nowak, Ronald M. 2005. *Walker's Marsupials of the World*. JHU Press.
- Nowak, Ronald M., Thomas H. Kunz, and Elizabeth D. Pierson. 1994. *Walker's Bats of the World*. Johns Hopkins University Press.
- O'Shea, M. 2007. *Boas and Pythons of the World*.
- Obst, F.J. 1986. *Turtles, Tortoises, and Terrapins*.
- Ochoa-Acuna, H, JM Francis, and DJ Boness. 1998. "Interannual Variation in Birth Mass and Postnatal Growth Rate of Juan Fernandez Fur Seals." *Canadian Journal of Zoology/Revue Canadien de Zoologie [Can. J. Zool./Rev. Can. Zool.]*. 76: 978–83.
- Oelschlager, H.H.A., S.H. Ridgway, and M. Knauth. 2010. "Cetacean Brain Evolution: Dwarf Sperm Whale (Kogia Sima) and Common Dolphin (Delphinus Delphis) - An Investigation with High-Resolution 3D MRI." *Brain, Behavior and Evolution* 75: 33–62.

- Olifiers, N., M. V. Vieira, and C. E. V. Grelle. 2004. "Geographic Range and Body Size in Neotropical Marsupials." *Global Ecology and Biogeography* 13 (5): 439–44.
- Oliveira, Adriano T., Wanessa R. Cruz, Jackson Pantoja-Lima, Sihame B. Araujo, Maria L.G. Araujo, Jaydione L. Marcon, and Marcos Tavares-Dias. 2011. "Morphological and Cytochemical Characterization of Thrombocytes and Leukocytes in Hatchlings of Three Species of Amazonian Freshwater Turtles." *Veterinarski Arhiv* 81 (5): 657–70.
- Olivier, Pieter I., Rudi J. Van Aarde, and Sam M. Ferreira. 2009. "Support for a Metapopulation Structure among Mammals." *Mammal Review* 39 (3): 178–92.
- Olsson, M., A. Gullberg, and H. Tegelstrom. 1996. "Malformed Offspring, Sibling Matings, and Selection against Inbreeding in the Sand Lizard (*Lacerta Agilis*)." *Journal of Evolutionary Biology* 9 (2): 229–42.
- Oniki, Yoshika. 1970. "Nesting Behavior of Reddish Hermits (*Phaethornis Ruber*) and Occurrence of Wasp Cells in Nests." *The Auk* 87 (4): 720–28.
- Opiang, Muse D. 2009. "Home Ranges, Movement, and Den Use in Long-Beaked Echidnas, *Zaglossus Bartoni*, from Papua New Guinea." *Journal of Mammalogy* 90 (2). American Society of Mammalogists: 340–46.
- Oprea, M., L.M.S. Aguilar, and D.E. Wilson. 2005. "Anoura Caudifer." *Mammalian Species* 844: 1–8.
- Ortega, J., and I. Castro-Arellano. 2001. "Artibeus Jamaicensis." *Mammalian Species* 662: 1–9.
- Ortega, J. Vite-De Leon, B., A. Tinajero-Espitia, and J.A. Romero-Meza. 2008. "Carollia Subrufa." *Mammalian Species* 823: 1–4.
- Ostroff, A.C., and E.J. Finck. 2003. "Spermophilus Franklinii." *Mammalian Species* 724: 1–5.
- Ouboter, Paul E., and Lurly M.R. Nanhoë. 1989. "Notes on the Dynamics of a Population of Caiman *Crocodylus Crocodylus* in Northern Suriname and Its Implications for Management." *Biological Conservation* 48 (4): 243–64.
- Ouboter, Paul E., and Geert M.T. Peeters. 1993. "The Annual Cycle of the Spectacled Caiman." *The Freshwater Ecosystems of Suriname* 70: 215–22.
- Packer, J.B., and T.E. Lee Jr. 2007. "Neusticomys Monticolus." *Mammalian Species* 805: 1–3.
- Padilla, M, R.C. Dowler, and C.C. Downer. 2010. "Tapirus Pinchaque." *Mammalian Species* 863: 166–82.
- Pain, D. J., A. A. Cunningham, P. F. Donald, J. W. Duckworth, D. C. Houston, T. Katzner, J. Parry-Jones, et al. 2003. "Causes and Effects of Temporospatial Declines of Gyps Vultures in Asia." *Conservation Biology* 17 (3): 661–71.

- Paleczny, Michelle. 2012. "An Analysis of Temporal and Spatial Patterns in Global Seabird Abundance during the Modern Industrial Era, 1950-2010, and the Relationship between Global Seabird Decline and Marine Fisheries Catch". The University of British Columbia.
- Palika, Liz. 2011. *Turtles & Tortoises For Dummies*. John Wiley & Sons.
- Palmer, C., R. Taylor, and A. Burbidge. 2003. "Recovery Plan for the Golden Bandicoot *Isodon Auratus* and Golden-Backed Tree-Rat *Mesembriomys Macrurus* 2004-2009". Darwin.
- Palomo, L.J., E.R. Justo, and J.M Vargas. 2009. "Mus Spretus." *Mammalian Species* 840: 1–10.
- Pangerc, Tanja. 2010. "Baleen Whale Acoustic Presence around South Georgia". University of East Anglia, Norwich.
- Panigrahy, G.K., and B.K. Patnaik. 1973. "Studies on the Connective Tissue of reptiles—I. Age Changes in Collagen and Water Contents of Bone and Hyoid Cartilage of Male Garden Lizard." *Experimental Gerontology* 8 (5): 251–57.
- Paquette, Sébastien Rioux, Edward E Louis, and François-Joseph Lapointe. 2010. "Microsatellite Analyses Provide Evidence of Male-Biased Dispersal in the Radiated Tortoise *Astrochelys Radiata* (Chelonia: Testudinidae)." *The Journal of Heredity* 101 (4): 403–12.
- Paradiso, J.L., and R.M. Nowak. 1972. "Canis Rufus." *Mammalian Species* 22: 1–4.
- Pardinas, U.F.J., and C.A. Gailliar. 2001. "Reithrodon Auritus." *Mammalian Species* 664: 1–8.
- Parrott, Dave, Sugoto Roy, Richard Baker, Ray Cannon, Dominic Eyre, Mark Hill, Markus Wagner, et al. 2009. "Horizon Scanning for New Invasive Non-Native Animal Species in England."
- Parton, William S. 2009. *Wingshooter's Guide to Arizona: Upland Birds and Waterfowl*. Wilderness Adventures Press.
- Patrick, R.R., D. Patrick, and K.D. Hunt. 2011. "Long Term Changes at the Toro-Semliki Wildlife Reserve." In *The Ecological Impact of Long Term Changes in Africa's Rift Valley*, edited by Andrew J. Plumptre, 308. NOVA Science Publishers.
- Pennington, Parker. 2009. "Characterization of the Common Eland (*Taurotragus Oryx*) Estrous Cycle". Louisiana State University.
- Pereira, Henrique M., Gretchen C. Daily, and Joan Roughgarden. 2004. "A Framework for Assessing the Relative Vulnerability of Species to Land-Use Change." *Ecological Applications* 14: 730–42.
- Perez, Aldeima. 2001. "Artificial Incubation of Caiman *Crocodylus Crocodylus* (baba) Eggs." *Tropical Animal Science* 19 (2): 151–64.

- Péron, Guillaume, Olivier Gimenez, Anne Charmantier, Jean-Michel Gaillard, and Pierre-André Crochet. 2010. "Age at the Onset of Senescence in Birds and Mammals Is Predicted by Early-Life Performance." *Proceedings. Biological Sciences / The Royal Society* 277 (1695): 2849–56.
- Perrin, W.F. 2001. "Stenella Attenuata." *Mammalian Species* 683: 108.
- Perrin, William F., J. Bernd Wursig, and G.M. Thewissen. 2009. *Encyclopedia of Marine Mammals*. Academic Press.
- Perrins, C.M., W.J. Bock, J. Kikkawa, and (Eds.). 1995. *Bird Families of the World: The Megapodes*. Edited by C.M. Perrins, W.J. Bock, and J. Kikkawa.
- Peters, Anne, Koen J.F. Verhoeven, and Henk Strijbosch. 1994. "Hatching and Emergence in the Turkish Mediterranean Loggerhead Turtle, *Caretta Caretta*: Natural Causes for Egg and Hatchling Failure." *Herpetologica* 50 (3): 369–73.
- Phillips, B.T., and S.M. Jackson. 2003. "Growth and Development of the Tasmanian Devil (*Sarophilus Harrisii*) at Healesville Sanctuary, Victoria, Australia." *Zoo Biology* 22: 497–505.
- Phillips, J.A., and R.P. Millar. 1998. "Varanus Albigularis." *Journal of Herpetology* 32: 366–77.
- Pianka, E. R., D. R. King, R. A. King, and (Eds.). 2004. *Varanoid Lizards of the World*. Edited by E. R. Pianka, D. R. King, and R. A. King.
- Piatt, John F. 2002. "Response of Seabirds to Fluctuations in Forage Fish Density". Anchorage, AK.
- Pincheira-Donoso, D., SF Fox, JA Scolaro, N. Ibarquengoytia, JC Acosta, V. Corbalan, M Medina, J Boretto, HJ Villavicencio, and DJ Hodgson. 2011. "Body Size Dimensions in Lizard Ecological and Evolutionary Research: Exploring the Predictive Power of Mass Estimation Equations in Two Liolaemidae Radiations." *The Herpetological Journal* 21 (1). British Herpetological Society: 35–42.
- Pires, M.M., E.G. Martins, M.N.F. Silva, and S.F. dos Reis. 2010. "Gracilinanus Microtarsus." *Mammalian Species* 851: 33–40.
- Platt, S.G., T.R. Rainwater, J.B. Thorbjarnarson, A.G. Finger, T.A. Anderson, and S.T. McMurry. 2009. "Size Estimation, Morphometrics, Sex Ratio, Sexual Size Dimorphism, and Biomass of Morelet's Crocodile in Northern Belize." *Caribbean Journal of Science* 45 (1): 80–93.
- Platt, S.G., L. Sigler, and T.R. Rainwater. 2010. "Morelet's Crocodile *Crocodylus Moreletii*." In *Crocodyles. Status Survey and Conservation Action Plan.*, edited by S.C. Manolis and C. Stevenson, Third Edit, 79–83. Crocodile Specialist Group. Darwin.
- Platt, Steven G, Vuthy Monyrath, Heng Sovannara, Long Kheng, and Thomas R Rainwater. 2012. "Nesting Phenology and Clutch Characteristics of Captive Siamese Crocodiles (*Crocodylus Siamensis*) in Cambodia." *Zoo Biology* 31 (5): 534–45.

- Platt, Steven G., and John B. Thorbjarnarson. 2000. "Population Status and Conservation of Morelet's Crocodile, *Crocodylus Moreletii*, in Northern Belize." *Biological Conservation* 96 (1): 21–29.
- Ponganis, P J, T K Stockard, J U Meir, C L Williams, K V Ponganis, and R Howard. 2009. "O<sub>2</sub> Store Management in Diving Emperor Penguins." *The Journal of Experimental Biology* 212 (Pt 2): 217–24.
- Post, William, W. Post, and J. S. Greenlaw. 2009. "Seaside Sparrow (*Ammodramus Maritimus*)." In *The Birds of North America Online*, edited by A. Poole.
- Potter, Eloise. 2012. *Birds of the Carolinas: Easyread Large Edition*. ReadHowYouWant.com.
- Prades, Rachel B., Emilia A. Lastica, and Jezie A. Acorda. 2013. "Ultrasonography of the Urogenital Organs of Male Water Monitor Lizard (*Varanus Marmoratus*, Weigmann, 1834)." *Philipp J Vet Anim Sci* 39 (2): 247–58.
- Prange, S., and T.J. Prange. 2009. "Bassaricyon Gabbii." *Mammalian Species* 826: 107.
- Presley, S.J. 2000. "Eira Barbara." *Mammalian Species* 636: 1–6.
- Priddel, David, and Robert Wheeler. 2003. "Nesting Activity and Demography of an Isolated Population of Malleefowl (*Leipoa Ocellata*)." *Wildlife Research* 30 (5). CSIRO PUBLISHING: 451.
- Prins, Herbert H.T., and Lain J. Gordon. 2014. *Invasion Biology and Ecological Theory: Insights from a Continent in Transformation*. Cambridge University Press.
- Proudfoot, G.A., and R.R. Johnson. 2000. "Ferruginous Pygmy-Owl." In *The Birds of North America Online*, edited by A. Poole.
- Puente-Rolon, Alberto R., and Fernando J. Bird-Pico. 2004. "Foraging Behavior, Home Range, Movements and Activity Patterns of *Epicrates Inornatus* (Boidae) at Mata de Platano Reserve in Arecibo, Puerto Rico." *Caribbean Journal of Science* 40 (3): 343–52.
- Quinn, J.S., and J.M. Startek-Foote. 2000. "Smooth-Billed Ani (*Crotophaga Ani*)." In *The Birds of North America Online*, edited by A. Poole.
- Radder, R.S., L. Pizzatto, and R. Shine. 2008. "Morphological Correlates of Life-History Variation: Is Lizard Clutch Size Related to the Number of Germ Beds in the Ovary?" *Biological Journal of the Linnean Society* 94: 81–88.
- Rafferty, John P. 2011a. *Grazers*. The Rosen Publishing Group.
- . 2011b. *Reptiles and Amphibians: Britannica Guide to Predators and Prey*. The Rosen Publishing Group.
- Rafferty, John P., and (Ed.). 2011. *Meat Eaters: Raptors, Sharks, and Crocodiles*. Edited by John P. Rafferty. illustrate. Britannica Educational Publishing.

- Rambaldini, D.A. 2010. "Glaucocycteris Variegata." *Mammalian Species* 870: 251–58.
- Ramesh, C., and S. Bhupathy. 2010. "A Report on the Unusual Body Weight of a Hatchling Python Molurus Molurus." *Reptile Rap: Newsletter of the South Asian Reptile Network*, June.
- Ramos, Renata Maria Arruda, Ana Paula Madeira Di Benedetto, and Neuza Rejane Wille Lima. 2000. "Growth Parameters of Pontoporia Blainvillei and Sotalia Fluviatilis (Cetacea) in Northern Rio de Janeiro, Brazil." *Aquatic Mammals* 26 (1): 65–75.
- Rao, K. Thulsi. 2006. "Crocodile the Endangered Apex Predator of Aquatic Eco-System and Its Rehabilitation in India." *EPTRI - ENVIS Newsletter* 12 (4): 2–4.
- Rao, M. S., P. R. Ojha, and R. Rao. 2013. "Breeding Performance of Red-Vented Bulbul (Pycnonotus Cafer) in Sikar Region (Rajasthan), India." *International Journal of Science and Research (IJSR), India Online* 2 (7): 319–22.
- Rasmussen, Justin Lee, Spencer G. Sealy, and Richard J. Cunnings. 2008. "Northern Saw-Whet Owl (Aegolius Acadicus)," In *The Birds of North America Online*, edited by A. Poole.
- Rathbun, G.B. 1979. "Rhynchocyon Chrysopygus." *Mammalian Species* 117: 1–4.
- Reaney, Leeann T., Stephen Yee, Jonathan B. Losos, and Martin J. Whiting. 2012. "Ecology of the Flap-Necked Chameleon Chamaeleo Dilepis In Southern Africa." *Breviora* 532 (September). Museum of Comparative Zoology, Harvard University: 1–18.
- Reed, J. Michael, Lewis W. Oring, and Elizabeth M. Gray. 2013. "Spotted Sandpiper (Actitis Macularius)." In *The Birds of North America Online*, edited by A. Poole.
- Reilly, J.S., M.A. Rose, D. Fenwick, I. Harris, A.W. Blackshaw, J.K. Blackshaw, and F.D. Shaw. 2001. *Euthanasia of Animals Used for Scientific Purposes*. Edited by J.S. Reilly. 2nd Ed. Adelaide, SA: ANZCCART.
- Remes, Vladimír. 2010. "Explaining Postnatal Growth Plasticity in a Generalist Brood Parasite." *Die Naturwissenschaften* 97 (3): 331–35.
- Remes, Vladimír, and Thomas E Martin. 2002. "Environmental Influences on the Evolution of Growth and Developmental Rates in Passerines." *Evolution; International Journal of Organic Evolution* 56 (12): 2505–18.
- Remor de Souza, R., and R.C. Vogt. 1994. "Incubation Temperature Influences Sex and Hatchling Size in the Neotropical Turtle Podocnemis Unifilis." *Journal of Herpetology* 28: 453–64.
- Renaud, M.L. 1995. "Movements and Submergence Patterns of Kemp's Ridley Turtles (Lepidochelys Kempii)." *Journal of Herpetology* 29: 370–74.

- Riccialdelli, Luciana, Seth D. Newsome, Natalia A. Dellabianca, Ricardo Bastida, Marilyn L. Fogel, and R. Natalie P. Goodall. 2013. "Ontogenetic Diet Shift in Commerson's Dolphin (*Cephalorhynchus Commersonii Commersonii*) off Tierra Del Fuego." *Polar Biology* 36 (5): 617–27.
- Ricklefs, R.E. 2010a. "Embryo Growth Rates in Birds and Mammals." *Functional Ecology* 24: 588–96.
- . 2010b. "Life-History Connections to Rates of Aging in Terrestrial Vertebrates." *Proceedings of the National Academy of Sciences* 107 (22). National Acad Sciences: 10314.  
doi:10.1073/pnas.1005862107/-  
/DCSupplemental.www.pnas.org/cgi/doi/10.1073/pnas.1005862107.
- Ridgway, S.H., R.J. Harrison, and (Eds.). 1981. *Handbook of Marine Mammals, Volume 1: The Walrus, Sea Lions, Fur Seals, and Sea Otter*. Edited by S.H. Ridgway and R.J. Harrison.
- Ridley, Mark. 1978. "Paternal Care." *Animal Behaviour* 26 (August): 904–32.
- Riedman, Marianne. 1990. *The Pinnipeds: Seals, Sea Lions, and Walruses*. University of California Press.
- Riskin, D.K. 2001. "Pipistrellus Bodenheimeri." *Mammalian Species* 651: 1–2.
- Rivas, Jesus Antonio. 2000. "The Life History of the Green Anaconda (*Eunectes Murinus*), with Emphasis on Its Reproductive Biology". The University of Tennessee.
- Robin, Libby, Chris Dickman, and Mandy Martin. 2011. *Desert Channels: The Impulse to Conserve*. CSIRO Publishing.
- Rogers, Kerrylee, Timothy J. Ralph, and (Eds.). 2011. *Floodplain Wetland Biota in the Murray-Darling Basin: Water and Habitat Requirements*. Edited by Kerrylee Rogers and Timothy J. Ralph. Csiro Publishing.
- Roots, Clive. 2006. *Hibernation*. Greenwood Publishing Group.
- Roots, E.H., and R.J. Baker. 2007. "Rhogeessa Parvula." *Mammalian Species* 804: 1–4.
- Rosi, M.I., M.I. Cona, V.G. Roig, A.I. Massarini, and D.H. Verzi. 2005. "Ctenomys Mendocinus." *Mammalian Species* 777: 1–6.
- Rossi, Rogerio V., Cleuton L. Miranda, Tarcisio S. Jr. Santos, and Thiago B.F. Semedo. 2010. "New Records and Geographic Distribution of the Rare *Glironia Venusta* (Didelphimorphia, Didelphidae)." *Mammalia* 74 (4): 445–47.
- Royle, Nick J., Per T. Smiseth, Mathias Kölliker, and (Eds.). 2012. *The Evolution of Parental Care*. Edited by Nick J. Royle, Per T. Smiseth, and Mathias Kölliker. illustrate. Oxford University Press.
- Ruckstuhl, Kathreen, and Peter Neuhaus. 2005. *Sexual Segregation in Vertebrates*. Cambridge University Press.



- Ruiz-Garcia, Manuel, and Joseph Mark Shostell. 2010. *Biology, Evolution and Conservation of River Dolphins Within South America and Asia (Wildlife Protection, Destruction and Extinction)*. NOVA Science Publications Inc.
- Ryan, Thomas P., and Charles T. Collins. 2000. "White-Throated Swift (*Aeronautes Saxatalis*)." In *The Birds of North America Online*, edited by A. Poole.
- Rydell, J., H. T. Arita, M. Santos, and J. Granados. 2002. "Acoustic Identification of Insectivorous Bats (order Chiroptera) of Yucatan, Mexico." *Journal of Zoology* 257 (1): 27–36.
- Saber, A.S., and Basma M. Kamal. 2010. "Computed Tomography and 3D Reconstruction of the Respiratory Organs of the Egyptian Tortoise (*Testudo Kleinmanni*)." *J. Vet. Anat.* 3 (1): 1–15.
- Saether, B-E., and O. Bakke. 2000. "Life History Variation and Contribution of Different Demographic Traits to the Population Growth Rate in Birds: A Comparative Approach." *Ecology* 81: 642–53.
- Sales, James. 2009. "Current Conservation Status of Ratites." *Journal of Threatened Taxa* 1 (1): 9–16.
- Salihoglu, Baris, William Fraser, and Eileen Hofmann. 2001. "Factors Affecting Fledging Weight of Adélie Penguin (*Pygoscelis Adeliae*) Chicks: A Modeling Study." *Polar Biology* 24 (5): 328–37.
- Sanchez-Hernandez, C., G.D. Schnell, and M. de Lourdes Romero-Almaraz. 2009. "Peromyscus Perfulvus." *Mammalian Species* 833: 1–8.
- Sankaran, R., and K. Sivakumar. 1999. "Preliminary Results of an Ongoing Study of the Nicobar Megapode *Megapodius Nicobariensis* Blyth." *Zoologische Verhandelingen* 327: 75–90.
- Santana, E.M., H.E. Jantz, and T.L. Best. 2010. "Atelerix Albiventris." *Mammalian Species* 42: 99–110.
- Santos, M., L.F. Aguirre, L.B. Vazquez, and J. Ortega. 2003. "Phyllostomus Hastatus." *Mammalian Species* 722: 1–6.
- Santos-Filho, Manoel, Carlos A. Peres, Dionei J. da Silva, Tânia M. Tania M. Sanaiotti, and Dionei J. Silva. 2012. "Habitat Patch and Matrix Effects on Small-Mammal Persistence in Amazonian Forest Fragments." *Biodiversity and Conservation* 21 (4): 1127–47.
- Savage, V.M., J.F. Gillooly, W.H. Woodruff, G.B. West, A.P. Allen, B.J. Enquist, and J.H. Brown. 2004. "The Predominance of Quarter-Power Scaling in Biology." *Functional Ecology* 18 (2): 257–82.
- Sazima, Marlies, Silvana Buzato, and Ivan Sazima. 1999. "Bat-Pollinated Flower Assemblages and Bat Visitors at Two Atlantic Forest Sites in Brazil." *Annals of Botany* 83: 705–12.
- Schelsky, Wendy M. 2004. "Research and Conservation of Forest-Dependent Tinamou Species in Amazonia Peru." *Ornitologia Neotropical* 15: 317–21.
- Schettino, Lourdes Rodríguez, Jonathan B. Losos, Paul E. Hertz, Kevin de Queiroz, Ada R. Chamizo, Manuel Leal, and Vilma Rivalta González. 2010. "The Anoles of Soroa: Aspects of Their Ecological

- Relationships." *Breviora* 520 (October). Museum of Comparative Zoology, Harvard University: 1–22.
- Schifter, H, and G R Cunningham-van Someren. 1998. "The Avifauna of the North Nandi Forest , Kenya", no. August 1997.
- Schikora, Tim F. 2012. "Climate-Linked Temporal and Spatial Patterns in the Evolution of African Bovidae". Goethe Universitat Frankfurt Am Main.
- Schilliger, L., O. Betremieux, J. Rocher, R. Krebber, and R. Schaper. 2009. "Absorption and Efficacy of a Spot-on Combination Containing Emodepside plus Praziquantel in Reptiles." *Revue de Medecine Veterinaire* 160 (12): 557–61.
- Schlee, Marsha A. 1989. "Breeding the Himalayan Griffon at the Paris Menagerie." *Int. Zoo Yb.* 28: 234–40.
- Schmidly, D.J. 1974. "Peromyscus Attwateri." *Mammalian Species* 48: 1–3.
- Schmidly, David J. 2004. *The Mammals of Texas: Revised Edition*. University of Texas Press.
- Schreiber, B.A., and R.W. Schreiber. 2009. "Red-Tailed Tropicbird (Phaethon Rubricauda)." In *The Birds of North America Online*, edited by A. Poole.
- Schreiber, E.A., P.F. Doherty, and G.A. Schenk. 2004. "Dispersal and Survival Rates of Adult and Juvenile Red-Tailed Tropicbirds (Phaethon Rubricauda) Exposed to Potential Contaminants." *Animal Biodiversity and Conservation* 27: 531–40.
- Schuck-Paima, Cynthia, Wladimir J. Alonsob, and Eduardo B. Ottonia. 2008. "Cognition in an Ever-Changing World: Climatic Variability Is Associated with Brain Size in Neotropical Parrots." *Brain, Behavior and Evolution* 71: 200–215.
- Schwartz, C.C. 1997. *Reproduction, Natalty, and Growth*,. Edited by AW Franzmann and CC Schwartz. *Ecology and Management of the North American Moose*.
- Scofield, R. Paul., and Ken. W. S. Ashwell. 2009. "Rapid Somatic Expansion Causes the Brain to Lag behind: The Case of the Brain and Behavior of New Zealand's Haast's Eagle ( Harpagornis Moorei )." *Journal of Vertebrate Paleontology* 29 (3). Taylor & Francis: 637–49.
- Secor, S.M., and J.A. Phillips. 1997. "Specific Dynamic Action of a Large Carnivorous Lizard, Varanus Albigularis." *Comp. Biochem. Physiol.* 117A: 515–22.
- Secor, Stephen M. 2009. "Specific Dynamic Action: A Review of the Postprandial Metabolic Response." *Journal of Comparative Physiology. B, Biochemical, Systemic, and Environmental Physiology* 179 (1): 1–56. doi:10.1007/s00360-008-0283-7.
- Seebeck, J.H., and R.W. Rose. 1998. "Potoroidae." In *Fauna of Australia, Volume 1b*, edited by D.W. Walton and B.J. Richardson, 1227. CSIRO Publishing.

- Semedo, Thiago Borges Fernandes, Laura Rodrigues Ribeiro, and Rogerio Vieira Rossi. 2013. "Inventario de Pequenos Mamíferos Não-Voadores." In *Descobrimos a Amazonia Meridional*, edited by Domingos de Jesus Rodrigues, Thiago J. Izzo, and Leandro Denis, 299.
- Serrano-Meneses, M.A., and T. Székely. 2006. "Sexual Size Dimorphism in Seabirds: Sexual Selection, Fecundity Selection and Differential Niche-Utilisation." *Oikos* 113 (3). Wiley Online Library: 385–94.
- Serrat, Maria A, Philip L Reno, Melanie A McCollum, Richard S Meindl, and C Owen Lovejoy. 2007. "Variation in Mammalian Proximal Femoral Development: Comparative Analysis of Two Distinct Ossification Patterns." *Journal of Anatomy* 210 (3): 249–58.
- Seymour, Roger S, Sue Runciman, and Russell V Baudinette. 2008. "Development of Maximum Metabolic Rate and Pulmonary Diffusing Capacity in the Superprecocial Australian Brush Turkey *Alectura Lathami*: An Allometric and Morphometric Study." *Comparative Biochemistry and Physiology. Part A, Molecular & Integrative Physiology* 150 (2): 169–75.
- Seymour, Roger S. 1979. "Dinosaur Eggs: Gas Conductance through the Shell, Water Loss during Incubation and Clutch Size." *Paleobiology* 5 (1): 1–11.
- Shanawany, M. M., John Dingle, and (Eds.). 1999. *Ostrich Production Systems, Parts 1-2*. Edited by M. M. Shanawany and John Dingle. illustrate. Food & Agriculture Org.
- Shanker, K, J Ramadevi, B C Choudhury, L Singh, and R K Aggarwal. 2004. "Phylogeography of Olive Ridley Turtles (*Lepidochelys Olivacea*) on the East Coast of India: Implications for Conservation Theory." *Molecular Ecology* 13 (7): 1899–1909.
- Sheridan, Claire Marie. 2010. "Mating System and Dispersal Patterns in the Diamondback Terrapin (*Malaclemys Terrapin*)". Drexel University.
- Sherwin, R.E., and W.L. Gannon. 2005. "Ariteus Flavescens." *Mammalian Species* 787: 1–3.
- Shine, Richard, and Jeanette Covacevich. 1983. "Ecology of Highly Venomous Snakes: The Australian Genus *Oxyuranus* (Elapidae)." *Journal of Herpetology* 17 (1): 60–69.
- Shine, Richard, Peter S. Harlow, J.Scott Keogh, and others. 1996. "Commercial Harvesting of Giant Lizards: The Biology of Water Monitors *Varanus Salvator* in Southern Sumatra." *Biological Conservation* 77 (2-3). Elsevier: 125–34.
- Shine, Richard, and Thomas Madsen. 1997. "Prey Abundance and Predator Reproduction: Rats and Pythons on a Tropical Australian Floodplain." *Ecology* 78 (4): 1078–86.
- Sibly, Richard M., James H. Brown, Astrid Kodric-Brown, and (Eds.). 2012. *Metabolic Ecology: A Scaling Approach*. Edited by Richard M. Sibly, James H. Brown, and Astrid Kodric-Brown. John Wiley & Sons.
- Silas, E G, M Vijayakumaran, and M Rajagopalan. 1984. "Yolk Utilization in the Egg of the Olive Ridley *Lepidochelys Olivacea*." *CMFRI Bulletin*. CMFRI.

- Silva, T.J., L.A.S. Monjelo, M.N.S. Viana, J.C. Pezzuti, P.C.M. Andrade, R.C. Vogt, and I.P. Farias. 2011. "Population Genetics Analysis of *Podocnemis Sextuberculata* (Testudines, Podocnemidae): Lack of Population Structure in the Central Amazon Basin." *Genetics and Molecular Research* 10 (3): 1393–1402.
- Silveira, Ronis Da, Zilca Campos, John Thorbjarnarson, and William E. Magnusson. 2013. "Growth Rates of Black Caiman (*Melanosuchus Niger*) and Spectacled Caiman (*Caiman Crocodilus*) from Two Different Amazonian Flooded Habitats." *Amphibia-Reptilia* 34: 437–49.
- Silveira, Luis Fabio, and Valter Jose da Silveira. 1998. "The Biology of Dwarf Tinamou, *Taoniscus Nanus*, with Notes on Its Breeding in Captivity." *Cotinga* 9: 47–51.
- Simmons, Robert E. 1997. "Why Don't All Siblicidal Eagles Lay Insurance Eggs? The Egg Quality Hypothesis." *Behavioral Ecology* 8: 544–50.
- Simpson, Boyd K., and Mark R. Bezuijen. 2010. "Siamese Crocodile *Crocodylus Siamensis*." In *Crocodyles. Status Survey and Conservation Action Plan*, edited by S.C. Manolis and C. Stevenson, Third Edit, 2:120–26. Darwin: Crocodile Specialist Group.
- Simpson, Ken N.G. 2008. "The 'mystery Penguin': An Additional Snares Penguin *Eudyptes Pachyrhynchus Robustus* for Tasmania." *The Tasmanian Naturalist* 130: 42–51.
- Sinclair, J. Ross. 2007. "12. Are We Doing Enough? A Review of the Conservation Status of Megapodes and the Implementation of Their Action Plans." Bronx, NY.
- Skurski, D.A., and J.M. Waterman. 2005. "Xerus Inauris." *Mammalian Species* 781: 1–4.
- Slip, David J., and Richard Shine. 1988. "The Reproductive Biology and Mating System of Diamond Pythons, *Morelia Spilota* (Serpentes: Boidae)." *Herpetologica* 44 (4): 396–404.
- Smirina, É. M., and Alexey Yu. Tsellarius. 2011. "Aging, Longevity, and Growth of the Desert Monitor Lizard (*Varanus Griseus* Daud.)." *Russian Journal of Herpetology*.
- Smith, Felisa A., S. Kathleen Lyons, and (Eds.). 2013. *Animal Body Size: Linking Pattern and Process across Space, Time, and Taxonomic Group*. Edited by Felisa A. Smith and S. Kathleen Lyons. University of Chicago Press.
- Smith, Paul. 2009. *Fauna Paraguay: Handbook of the Mammals of Paraguay, Volume 1: Marsupialia*.
- Snodgrass, J. Josh, William R. Leonard, and Marcia L. Robertson. 2007. "Primate Bioenergetics: An Evolutionary Perspective." In *Primate Origins: Adaptations and Evolution*, edited by Matthew J. Ravosa and Marian Dagosto, 864. Springer.
- Sobrero, R., Campos, V.E., S.M. Giannoni, and L.A. Ebersperger. 2010. "Octomys Mimax." *Mammalian Species* 853: 49–57.

- Solar-Frost, A., R.A. Medellin, and G.N. Cameron. 2003. "Pappogeomys Bulleri." *Mammalian Species* 717: 1–3.
- Soligo, Christophe, and Robert D. Martin. 2006. "Adaptive Origins of Primates Revisited." *Journal of Human Evolution* 50: 414–30.
- Solmsen, E.H., and H. Schliemann. 2008. "Choeroniscus Minor." *Mammalian Species* 822: 1–6.
- Spotorno, A.E., C.A. Zuleta, J.P. Valladares, A.L. Deane, and J.E. Jimenez. 2004. "Chinchilla Laniger." *Mammalian Species* 758: 1–9.
- St. Louis, A., and S.D. Cote. 2009. "Equus Kiang." *Mammalian Species* 835: 1–11.
- Stahlschmidt, Zachary R, and Dale F Denardo. 2009. "Effect of Nest Temperature on Egg-Brooding Dynamics in Children's Pythons." *Physiology & Behavior* 98 (3): 302–6.
- Standen, Wade. 2008. "Husbandry Manual for Short Tailed Monitor Varanus Brevicauda (Reptilia: Varanidae)". Richmond.
- Starck, J. Matthias, and Ernst Sutter. 2000. "Patterns of Growth and Heterochrony in Moundbuilders (Megapodiidae) and Fowl (Phasianidae)." *Journal of Avian Biology* 31 (4): 527–47.
- Stebbins, R.C. 2003. *A Field Guide to Western Reptiles and Amphibians*. 3rd ed.
- Stebbins, Robert Cyril, and Samuel M. McGinnis. 2012. *Field Guide to Amphibians and Reptiles of California*. University of California Press.
- Stevenson, C., and R. Whitaker. 2010. "Indian Gharial Gavialis Gangeticus." In *Crocodiles. Status Survey and Conservation Action Plan*, edited by S.C. Manolis and C. Stevenson, Third Edit, 139–43. Darwin: Crocodile Specialist Group.
- Stone, Graham N., and Andy Purvis. 1992. "Warm-up Rates during Arousal from Torpor in Heterothermic Mammals: Physiological Correlates and a Comparison with Heterothermic Insects." *Journal of Comparative Physiology B* 162: 284–95.
- Storer, R. W., and G. L. Nuechterlein. 1992. "Western Grebe (Aechmophorus Occidentalis)." In *The Birds of North America Online*, edited by A. Poole.
- Street, D. 1979. *The Reptiles of Northern and Central Europe*.
- Streubel, D.P., and J.P. Fitzgerald. 1978a. "Spermophilus Tridecemlineatus." *Mammalian Species* 103: 1–5.
- . 1978b. "Spermophilus Spilosoma." *Mammalian Species* 101: 1–4.
- Stuart-Smith, J., R. Swain, R.D. Stuart-Smith, and E. Wapstra. 2007. "Is Fecundity the Ultimate Cause of Female-Biased Size Dimorphism in a Dragon Lizard?" *Journal of Zoology* 273: 266–72.

- Subach, Aziz, Inon Scharf, and Ofer Ovadia. 2009. "Foraging Behavior and Predation Success of the Sand Viper ( *Cerastes Vipera* )." *Canadian Journal of Zoology* 87 (6): 520–28.
- Sulentich, J.M., L.R. Williams, and G.N. Cameron. 1991. "Geomys Breviceps." *Mammalian Species* 383: 1–4.
- Suryan, R. M., D. B. Irons, E. D. Brown, P. G. R. Jodice, and D. D. Roby. 2006. "Site-Specific Effects on Productivity of an Upper Trophic-Level Marine Predator: Bottom-Up, Top-Down, and Mismatch Effects on Reproduction in a Colonial Seabird." *Progress in Oceanography* 68 (2-4): 303–28.
- Sweeney, R.C.H. 1960. "The Chelonia of Nyasaland Protectorate." *The Nyasaland Journal* 13 (1): 35–50.
- Szekely, Tamas, Terje Lislevand, and Jordi Figuerola. 2007. "Sexual Size Dimorphism in Birds." In *Sex, Size and Gender Roles*, edited by W. Blanckenhorn, D. Fairbairn, and T. Szekely, 27–37.
- Tacutu, R., T. Craig, A. Budovsky, D. Wuttke, G. Lehmann, D. Taranukha, J. Costa, V.E. Fraifeld, and J.P. de Magalhaes. 2013. "Human Ageing Genomic Resources: Integrated Databases and Tools for the Biology and Genetics of Ageing." *Nucleic Acids Research* 41 (D1): D1027–D1033.
- Tamarin, R.H., and T.H. Kunz. 1974. "Microtus Breweri." *Mammalian Species* 45: 1–3.
- Targarona, Roberto Ramos, Roberto Rodriguez Soberon, Manuel Alonso Tabet, and John B. Thorbjarnarson. 2010. "Cuban Crocodile *Crocodylus Rhombifer*." In *Crocodyles. Status Survey and Conservation Action Plan*, edited by S.C. Manolis and C. Stevenson, Third Edit, 114–18. Darwin: Crocodile Specialist Group.
- Tarwater, Corey E, Robert E Ricklefs, J Dylan Maddox, and Jeffrey D Brawn. 2011. "Pre-Reproductive Survival in a Tropical Bird and Its Implications for Avian Life Histories." *Ecology* 92 (6): 1271–81.
- Taylor, B.L., S.J. Chivers, J. Larese, and W.F. Perrin. 2007. "Generation Length and Percent Mature Estimates for IUCN Assessments of Cetaceans."
- Taylor, M.E. 1972. "Ichneumia Albicauda." *Mammalian Species* 12: 1–4.
- Taylor, Sue. 2012. *John Gould's Extinct and Endangered Birds of Australia*. illustrate. National Library Australia.
- Tejedor, Adrian. 2005. "A New Species of Funnel-Eared Bat (Natalidae: Natalus) from Mexico." *Journal of Mammalogy* 86 (6): 1109–20.
- Tellez, G., and J. Ortega. 1999. "Musonycteris Harrisoni." *Mammalian Species* 622: 1–3.
- Teta, P., U.F.J. Pardinas, D.E. Udrizar Sauthier, and G. D'Elia. 2009. "Loxodontomys Micropus." *Mammalian Species* 837: 1–11.

- Theiler, G.R., C.N. Gardenal, and A. Blanco. 1999. "Patterns of Evolution in *Graomys Griseoflavus* (Rodentia, Muridae). IV. A Case of Rapid Speciation." *Journal of Evolutionary Biology* 12 (5): 970–79.
- Theissinger, Kathrin, N. N. FitzSimmons, C. J. Limpus, C. J. Parmenter, and A. D. Phillott. 2009. "Mating System, Multiple Paternity and Effective Population Size in the Endemic Flatback Turtle (*Natator Depressus*) in Australia." *Conservation Genetics* 10 (2): 329–46.
- Thielen, Dirk R, Daniel R Cabello, Guillermo Bianchi-Pérez, and Paolo Ramoni-Perazzi. 2009. "Rearing Cycle and Other Reproductive Parameters of the Xerophitic Mouse Opossum *Marmosa Xerophila* (Didelphimorphia: Didelphidae) in the Peninsula of Paraguana, Venezuela." *Interciencia* 34 (3). Asociación Interciencia: 195–98.
- Tholon, P, Queiroz SA, and SA Queiroz. 2007. "Models for the Analysis of Growth Curves for Rearing Tinamous (*Rhynchotus Rufescens*) in Captivity." *Brazilian Journal of Poultry Science* 9 (1). Fundação APINCO de Ciência e Tecnologia Avícolas: 23–31.
- Thomas M Wilms, Philipp Wagner. 2010. "Aspects of the Ecology of the Arabian Spiny-Tailed Lizard (*Uromastix Aegyptia Microlepis* Blanford, 1875) at Mahazat as-Sayd Protected Area, Saudi Arabia." *Salamandra* 46 (3): 131 – 140.
- Thompson, C.W., J.R. Choate, H.H. Genoways, and E.J. Finck. 2011. "Blarina Hylophaga." *Mammalian Species* 878: 94–103.
- Thompson, G.G., and E.R. Pianka. 2001. "Allometry of Clutch and Neonate Sizes in Monitor Lizards (Varanidae: *Varanus*)." *Copeia* 2 (2): 443–58.
- Thorbjarnarson, J.B. 1996. "Reproductive Characteristics of the Order Crocodylia." *Herpetologica* 52 (1). JSTOR: 8–24.
- Thorbjarnarson, John B. 1994. "Reproductive Ecology of the Spectacled Caiman (*Caiman Crocodilus*) in the Venezuelan Llanos." *Copeia* 1994 (4): 907–19.
- . 2010. "Black Caiman *Melanosuchus Niger*." In *Crocodyles. Status Survey and Conservation Action Plan*, edited by S.C. Manolis and C. Stevenson, Third Edit, 29–39. Darwin: Crocodile Specialist Group.
- Thorbjarnarson, John B., and Gustavo Hernández. 1993. "Reproductive Ecology of the Orinoco Crocodile (*Crocodylus Intermedius*) in Venezuela. I. Nesting Ecology and Egg and Clutch Relationships." *Journal of Herpetology* 27 (4). JSTOR: 363–70.
- Thorbjarnarson, John B., and Xiaoming Wang. 2010. *The Chinese Alligator: Ecology, Behavior, Conservation, and Culture*. JHU Press.
- Thorbjarnarson, John, Xiaoming Wang, and Lijun He. 2001. "Reproductive Ecology of the Chinese Alligator (*Alligator Sinensis*) and Implications for Conservation." *Journal of Herpetology* 35. JSTOR: 553–58.

- Tickell, W L N. 1991. "The Biology of the Great Albatrosses, *Diomedea Exulans* and *Diomedea Epomophora*." In *Antarctic Bird Studies: Antarctic Research Series*, 12:262. American Geophysical Union.
- Tidemann, Sonia C., Andrew Gosler, and (Eds.). 2010. *Ethno-Ornithology: Birds, Indigenous Peoples, Culture and Society*. Edited by Sonia C. Tidemann and Andrew Gosler. Washington, DC; London, UK: Earthscan.
- Timmermans, S.T.A., G.E. Craigie, and K.E. Jones. 2004. "Common Loon Pairs Rear Four-Chick Broods." *The Wilson Bulletin* 116 (1). JSTOR: 97–101.
- Tindle, Robert W., L. Elizabeth Tindle, Dimitrios Vagenas, and Michael P. Harris. 2013. "Population Dynamics of the Galápagos Flightless Cormorant *Phalacrocorax Harrisii* in Relation to Sea Temperature." *Marine Ornithology* 41: 121–33.
- Tingay, Ruth E., Todd E. Katzner, and (Eds.). 2010. *The Eagle Watchers: Observing and Conserving Raptors Around the World*. Edited by Ruth E. Tingay and Todd E. Katzner. illustrate. Cornell University Press.
- Todd, Charles S. 2000. "Eastern Box Turtle Assessment."
- Tognelli, M.F., C.M. Campos, and R.A. Ojeda. 2001. "Microcavia Australis." *Mammalian Species* 648: 1–4.
- Tolley, Krystal A., and Anthony Herrel. 2013. *The Biology of Chameleons*. University of California Press.
- Townsend, W.R. 2001. "Callithrix Pygmaeus." *Mammalian Species* 665: 1–6.
- Trauth, Stanley E. 1984. "Seasonal Incidence and Reproduction in the Western Slender Glass Lizard, *Ophisaurus Attenuatus Attenuatus* (Reptilia, Anguillidae), in Arkansas." *The Southwestern Naturalist* 29 (3): 271–75.
- Trujano-Alvarez, A.L., and S.T. Alvarez-Castaneda. 2010. "Peromyscus Mexicanus." *Mammalian Species* 858: 111–18.
- Trumble, Stephen J, Eleanor M Robinson, Michelle Berman-Kowalewski, Charles W Potter, and Sascha Usenko. 2013. "Blue Whale Earplug Reveals Lifetime Contaminant Exposure and Hormone Profiles." *Proceedings of the National Academy of Sciences of the United States of America* 110 (42): 16922–26.
- Twit, R.C., and D.M. Finch. 1994. "Abert's Towhee." In *The Birds of North America Online*, edited by A. Poole.
- Tyndale-Biscoe, Hugh, and Marilyn Renfree. 1987. *Monographs on Marsupial Biology: Reproductive Physiology of Marsupials*.



- Ujvari, Beata, Richard Shine, and Thomas Madsen. 2010. "Detecting the Impact of Invasive Species on Native Fauna: Cane Toads (*Bufo Marinus*), Frillneck Lizards (*Chlamydosaurus Kingii*) and the Importance of Spatial Replication." *Austral Ecology* 36 (2): 126–30.
- Uller, T, G M While, E Wapstra, D A Warner, B A Goodman, L Schwarzkopf, T Langkilde, et al. 2009. "Evaluation of Offspring Size-Number Invariants in 12 Species of Lizard." *Journal of Evolutionary Biology* 22 (1): 143–51.
- Unwin, Mike. 2011. *Southern African Wildlife*. Bradt Travel Guides.
- Uzum, Nazan, Cetin Ilgaz, Yusuf Kumlutas, Cicek Gumus, and Aziz Avci. 2014. "The Body Size, Age Structure, and Growth of Bosc's Fringe-Toed Lizard, *Acanthodactylus Boskianus* (Daudin, 1802)." *Turkish Journal of Zoology* 38: 1–6.
- Valenzuela, Nicole. 2001. "Maternal Effects on Life-History Traits in the Amazonian Giant River Turtle *Podocnemis Expansa*." *Journal of Herpetology* 35 (3): 368–78. doi:10.2307/1565954.
- Van Bloemestein, Ulric P. 2005. "Seasonal Movement and Activity Patterns of the Endangered Geometric Tortoise, *Psammobates Geometricus*". University of the Western Cape.
- Van Buskirk, Josh, and Larry B. Crowder. 1994. "Life-History Variation in Marine Turtles." *Copeia* 1 (1). JSTOR: 66–91.
- Van Dyck, Stephen. 1982. "The Status and Relationships of the Atherton Antechinus, *Antechinus Godmani* (Marsupialia: Dasyuridae)." *Australian Mammal Society* 5 (3-4): 195–210.
- Van Houtan, Kyle S., John M. Halley, Rudi Van Aarde, and Stuart L. Pimm. 2009. "Achieving Success with Small, Translocated Mammal Populations." *Conservation Letters* 2 (6): 254–62.
- Van Weerd, Merlijn. 2010. "Philippine Crocodile *Crocodylus Mindorensis*." In *Crocodiles. Status Survey and Conservation Action Plan*, edited by S.C. Manolis and C. Stevenson, Third Edit, 71–78. Darwin: Crocodile Specialist Group.
- Vasudevan, K. (Ed.). 2009. "Freshwater Turtles and Tortoises of India." *ENVIS Bulletin: Wildlife and Protected Areas* 12 (1): 177.
- Vazquez, L.B., G.N. Cameron, and R.A. Medellin. 2001. "*Peromyscus Aztecus*." *Mammalian Species* 649: 1–4.
- Velasco, A., and J. Ayarzagüena. 2010. "Spectacled Caiman *Crocodylus*." In *Crocodiles. Status Survey and Conservation Action Plan*, edited by S.C. Manolis and C. Stevenson, Third Edit, 10–15. Darwin: Crocodile Specialist Group.
- Velten, Brandy P. 2012. "A Comparative Study of the Locomotor Muscle of Extreme Deep-Diving Cetaceans". University of North Carolina - Wilmington.

- Verboven, Nanette, Joost M Tinbergen, Simon Verhulst, N Verboven, J M Tinbergen, and S Verhulst Food. 2001. "Food, Reproductive Success and Multiple Breeding in the Great Tit *Parus Major*." *Ardea* 89 (2): 387–406.
- Verdade, Luciano Martins, Rodrigo Barban Zucoloto, and Luiz Lehmann Coutinho. 2002. "Microgeographic Variation in *Caiman Latirostris*." *The Journal of Experimental Zoology* 294 (4): 387–96.
- Verts, B.J., and L.N. Carraway. 2000. "Thomomys Mazama." *Mammalian Species* 641: 1–7.
- . 2001. "Tamias Minimus." *Mammalian Species* 653: 1–10.
- . 2003. "Thomomys Townsendii." *Mammalian Species* 719: 1–6.
- Verts, B.J., L.N. Carraway, and A. Kinlaw. 2001. "Spilogale Gracilis." *Mammalian Species* 674: 1–10.
- Verts, B.J., and Leslie N. Carraway. 1998. *Land Mammals of Oregon*. University of California Press.
- Vickery, Peter D. 1996. "Grasshopper Sparrow (*Ammodramus Savannarum*)." In *The Birds of North America Online*, edited by A. Poole.
- Vieira, M.V. 1997. "Dynamics of a Rodent Assemblage in a Cerrado of Southwest Brazil." *Rev. Brasil. Biol* 57: 99–107.
- Villalobos, Hernán Araya, and Marco T. Saborío M. 2007. "Observaciones Y Seguimiento de La Anidada de Un *Selasphorus Scintilla*." *Zeledonia* 11 (1): 32–38.
- Villamarín-Jurado, Francisco, and Esteban Suárez. 2007. "Nesting of the Black Caiman (*Melanosuchus Niger*) in Northeastern Ecuador." *Journal of Herpetology* 41 (1). The Society for the Study of Amphibians and Reptiles: 164–67.
- Vincent, S E, M C Brandley, A Herrel, and M E Alfaro. 2009. "Convergence in Trophic Morphology and Feeding Performance among Piscivorous Natricine Snakes." *Journal of Evolutionary Biology* 22 (6): 1203–11.
- Visser, Gerard, Sandra Bijhold, and Judith Van Der Koore. 2009. "A Third Captive Generation of Komodo Dragons (*Varanus Komodoensis*) at Rotterdam Zoo, The Netherlands." *Biawak* 3 (2): 57–60.
- Vogt, Richard C., John R. Polisar, Don Moll, and Gracia Gonzalez-Porter. 2011. "Dermatemys Mawii Gray 1847 - Central American River Turtle, Tortuga Blanca, Hickatee." In *Conservation Biology of Freshwater Turtles and Tortoises: A Compilation Project of the IUCN/SSC Tortoise and Freshwater Turtle Specialist Group*, 058.1–058.12.
- Voigt, C C. 2003. "Reproductive Energetics of the Nectar-Feeding Bat *Glossophaga Soricina* (Phyllostomidae)." *Journal of Comparative Physiology. B, Biochemical, Systemic, and Environmental Physiology* 173 (1): 79–85.

- Voigt, Christian C., Felix Matt, Robert Michener, and Thomas H. Kunz. 2003. "Low Turnover Rates of Carbon Isotopes in Tissues of Two Nectar-Feeding Bat Species." *Journal of Experimental Biology* 206 (8): 1419–27.
- Voisin, Claire. 2010. *The Herons of Europe*. A&C Black.
- Voss, Robert S., Burton K. Lim, Juan F. Diaz-Nieto, and Sharon A. Jansa. 2013. "A New Species of Marmosops (Marsupialia: Didelphidae) from the Pakaraima Highlands of Guyana, with Remarks on the Origin of the Endemic Pantepui Mammal Fauna." *American Museum Novitates* 3778: 27.
- Votier, Stephen C., Stuart Bearhop, Norman Ratcliffe, Richard A. Phillips, and Robert W. Furness. 2004. "Predation by Great Skuas at a Large Shetland Seabird Colony." *Journal of Applied Ecology* 41 (6): 1117–28.
- Vyas, Raju. 2005. "Captive Breeding of the Indian Star Tortoise (*Geochelone Elegans*)." *Zoos' Print Journal* 20 (5): 1859–64.
- Waengsothorn, Surachit, Jarujin Nathitabhata, and Tiensiri Moonchan. 2007. "The Ecological Distribution of Thai Endemic Rodents with a New Distributional Range of *Niviventer hinpoon*." *The Thailand Natural History Museum Journal* 2 (1): 31–42.
- Walker, Kath, and Graeme Elliott. 1999. "Population Changes and Biology of the Wandering Albatross *Diomedea exulans gibsoni* at the Auckland Islands." *Emu* 99 (4). CSIRO: 239–47.
- Wallis, I.R., B.T. Henen, and K.A. Nagy. 1999. "Egg Size and Annual Egg Production by Female Desert Tortoises (*Gopherus agassizii*): The Importance of Food Abundance, Body Size, and Date of Egg Shelling." *Journal of Herpetology* 33: 394–408.
- Wanchai, Pratyaporn, Craig B. Stanford, Art-Ong Pradatsundarasar, Kampanat Tharapoom, and Kumthorn Thirakhupt. 2013. "Activity Budget of the Impressed Tortoise, *Manouria impressa* (Gunther, 1882) in Phu Luang Wildlife Sanctuary, Thailand." *Tropical Natural History* 13 (1): 39–48.
- Wanchai, Pratyaporn, Craig B. Stanford, Kumthorn Thirakhupt, and Somying Thanhikorn. 2012. "Home Range of the Impressed Tortoise, *Manouria impressa* (Gunther, 1882) at Phu Luang Wildlife Sanctuary, Loei Province, Thailand." *Tropical Natural History* 12 (2): 165–74.
- Warburton, Natalie, Christopher Wood, Christopher Lloyd, Swithin Song, and Philip Withers. 2003. "The 3-Dimensional Anatomy of the North-Western Marsupial Mole (*Notoryctes caurinus* Thomas 1920) Using Computed Tomography, X-Ray and Magnetic Resonance Imaging." *Records of the Western Australian Museum* 22: 1–7.
- Ward, Adam. 2004. *Pocket Factfiles Endangered Animals*. Sterling Publishing Company, Inc.
- Waring, Gordon T., Elizabeth Josephson, Katherine Maze-Foley, and Patricia E. Rosel. 2013. "U.S. Atlantic and Gulf of Mexico Marine Mammal Stock Assessments - 2012 (10 Revised Reports)."

- Warne, Robin W, and Eric L Charnov. 2008. "Reproductive Allometry and the Size-Number Trade-off for Lizards." *The American Naturalist* 172 (3): E80–E98. doi:10.1086/589880.
- Warner, R.M. 1982. "Myotis Auriculus." *Mammalian Species* 191: 1–3.
- Wasser, D. E., and P. W. Sherman. 2010. "Avian Longevities and Their Interpretation under Evolutionary Theories of Senescence." *Journal of Zoology* 280 (2): 103–55.
- Waterman, J.M., and M.D. Herron. 2004. "Xerus Princeps." *Mammalian Species*.
- Watkins, L.C. 1972. "Nycticeius Humeralis." *Mammalian Species* 23: 1–4.
- . 1977. "Euderma Maculatum." *Mammalian Species* 77: 1–4.
- Watson, Charles, Jan Provis, and Suzana Herculano-Houzel. 2012. "What Determines Motor Neuron Number? Slow Scaling of Facial Motor Neuron Numbers with Body Mass in Marsupials and Primates." *The Anatomical Record* 295 (10): 1683–91.
- Webb, GJW, SC Manolis, and R Buckworth. 1983. "Crocodylus Johnstoni in the McKinlay River Area N. T, VI.\* Nesting Biology." *Wildlife Research* 10 (3). CSIRO PUBLISHING: 607.
- Webster, Marcus D. 1999. "Verdin (Auriparus Flaviceps)." In *The Birds of North America Online*, edited by A. Poole.
- Weidensaul, Scott, T. R. Robinson, R. R. Sargent, and M. B. Sargent. 2013. "Ruby-Throated Hummingbird (Archilochus Colubris)." In *The Birds of North America Online*, edited by A. Poole.
- Weigl, R. 2005. *Longevity of Mammals in Captivity; From the Living Collections of the World*.
- Weijola, Valter S-A, and Samuel S. Sweet. 2010. "A New Melanistic Species of Monitor Lizard (Reptilia: Squamata: Varanidae) from Sanana Island, Indonesia." *Zootaxa* 2434: 17–32.
- Weimerskirch, H., and P. Lys. 2000. "Seasonal Changes in the Provisioning Behaviour and Mass of Male and Female Wandering Albatrosses in Relation to the Growth of Their Chick." *Polar Biology* 23 (11): 733–44. doi:10.1007/s003000000144.
- Welch, Kenneth C. Jr, L. Gerardo Herrera M., and Raul K. Suarez. 2008. "Dietary Sugar as a Direct Fuel for Flight in the Nectarivorous Bat Glossophaga Soricina." *Journal of Experimental Biology* 211 (3): 310–16.
- Weller, Florian. 2011. "Testing the Power of an Experiment to Measure Predator Control and Habitat Complexity Impacts on Farmland Bird Abundance." *New Zealand Journal of Ecology* 35 (1): 44–51.
- Welton, L.J., C.D. Siler, D. Bennett, A. Diesmos, M.R. Duya, R. Dugay, E.L.B. Rico, M. Van Weerd, and R. Brown. 2010. "A Spectacular New Philippine Monitor Lizard Reveals a Hidden Biogeographic Boundary and a Novel Flagship Species for Conservation." *Biology Letters*.

- Werner, Jan. 2010. "Die Reproduktion von Dinosauriern, Speziell Der Sauropoden Und Deren Bedeutung Für Ihren Gigantismus." *Ubm.opus.hbz-Nrw.de*. Johannes Gutenberg-Universität Mainz.
- Werner, Jan, and Eva Maria Griebeler. 2012. "Reproductive Investment in Moa: A K-Selected Life-History Strategy?" *Evolutionary Ecology*, January. doi:10.1007/s10682-011-9552-0.
- . 2013. "New Insights into Non-Avian Dinosaur Reproduction and Their Evolutionary and Ecological Implications: Linking Fossil Evidence to Allometries of Extant Close Relatives." *PLoS One* 8 (8). Public Library of Science: e72862.
- Wesiak, Klaus, and Andre Koch. 2009. "Successful Husbandry and First Breeding of *Varanus juxtindicus* Bohme et Al., 2002, with Remarks on the Development of Juveniles of This 'Rarely-Kept' Endemic Solomon Monitor Species." *Biawak* 3 (4): 106–21.
- West, George C., and Carol A. Butler. 2010. *Do Hummingbirds Hum?: Fascinating Answers to Questions about Hummingbirds*. illustrate. Rutgers University Press.
- Whitaker Jr., J.O. 2004. "Sorex cinereus." *Mammalian Species*.
- Wiebe, Karen L., Walter D. Koenig, and Kathy Martin. 2006. "Evolution of Clutch Size in Cavity-Excavating Birds: The Nest Site Limitation Hypothesis Revisited." *American Naturalist* 167 (3): 343–53. doi:10.1086/499373.
- Wiechmann, Ralf. 2012. "Observations on Parthenogenesis in Monitor Lizards." *Biawak* 6 (1): 11–21.
- Wikramanayake, E.D., and G.L. Dryden. 1988. "The Reproductive Ecology of *Varanus indicus* on Guam." *Herpetologica* 44: 338–44.
- Williams, S.L., and R.J. Baker. 1974. "Geomys arenarius." *Mammalian Species* 36: 1–3.
- Williams, S.L., J. Ramirez-Pulido, and R.J. Baker. 1985. "Peromyscus alstoni." *Mammalian Species* 242: 1–4.
- Willis, Craig K. R., and R. Mark Brigham. 2005. "Physiological and Ecological Aspects of Roost Selection by Reproductive Female Hoary Bats (*Lasiurus cinereus*)." *Journal of Mammalogy* 86 (1): 85–94.
- Willson, John D., Michael E. Dorcas, and Raymond W. Snow. 2011. "Identifying Plausible Scenarios for the Establishment of Invasive Burmese Pythons (*Python molurus*) in Southern Florida." *Biological Invasions* 13 (7): 1493–1504.
- Wilson, D.E., and E. Hanlon. 2008. "Lemur catta." *Mammalian Species* 854: 58–74.
- Wilson, D.E., and R.K. LaVal. 1974. "Myotis nigricans." *Mammalian Species* 39: 1–3.
- Wilson, Edward O. 2003. "The Encyclopedia of Life." *Trends in Ecology and Evolution* 18 (2): 77–80.
- Wilson, Kerry Jayne. 2000. "Trial of Burrow Flaps to Protect Petrel Chicks". Wellington, New Zealand.

- Wilson, Steve K. 2012. *Australian Lizards: A Natural History*. CSIRO Publishing.
- Winter, York, Christian Voigt, and Otto Von Helversen. 1998. "Gas Exchange during Hovering Flight in a Nectar-Feeding Bat *Glossophaga Soricina*." *Journal of Experimental Biology* 201 (2): 237–44.
- Wnek, John P. 2010. "Anthropogenic Impacts on the Reproductive Ecology of the Diamondback Terrapin, *Malaclemys Terrapin*". Drexel University.
- Wood, Kevin Anthony. 2012. "Swan-Plant Interactions in a Chalk River Catchment". Bournemouth University.
- Woodman, N., and A. Diaz de Pascual. 2004. "Cryptotis Meridensis." *Mammalian Species* 761: 1–5.
- Woodman, Neal. 2010. "Two New Species of Shrews (Soricidae) from the Western Highlands of Guatemala." *Journal of Mammalogy* 91 (3): 566–79.
- Woolfenden, Glen E., and John W. Fitzpatrick. 1996. "Florida Scrub-Jay (*Aphelocoma Coerulescens*)." In *The Birds of North America Online*, edited by A. Poole.
- Woolley, PA, and A Valente. 1986. "Reproduction in *Sminthopsis Longicaudata* (Marsupialia, Dasyuridae) - Laboratory Observations." *Wildlife Research* 13 (1). CSIRO PUBLISHING: 7.
- Wright, G.S. 2009. "Hipposideros Caffer." *Mammalian Species* 845: 1–9.
- Wursig, Bernd, and Melany Wursig. 2009. *The Dusky Dolphin: Master Acrobat Off Different Shores*. Academic Press.
- Yalden, D.W. 1985. "Tachyoryctes Macrocephalus." *Mammalian Species* 237: 1–3.
- Yee, D.A. 2000. "Peropteryx Macrotis." *Mammalian Species* 643: 1–4.
- Yensen, E., and K.L. Seymour. 2000. "Oreailurus Jacobita." *Mammalian Species* 644: 1–6.
- Yensen, E., and T. Tarifa. 2003a. "Galictis Cuja." *Mammalian Species* 728: 1–8.
- . 2003b. "Galictis Vittata." *Mammalian Species* 727: 1–8.
- Yom-Tov, Y., and A. Ar. 1993. "Incubation and Fledging Durations of Woodpeckers." *The Condor* 95: 282–87.
- Yoon, Jongmin, Sang-Hee Na, Su-Kyung Kim, and Shi-Ryong Park. 2012. "Use of the Foraging Area by Captive Bred Oriental Storks (*Ciconia Boyciana*) in a Closed Semi Natural Paddy Field." *J. Ecol. Field Biol.* 35 (2): 149–55.
- Young, C.J., and J.K. Jones. 1983. "Peromyscus Yucatanicus." *Mammalian Species* 196: 1–3.
- Youngman, P.M. 1990. "Mustela Lutreola." *Mammalian Species* 362: 1–3.

- Yuyek, Matthew D. 2012. "Husbandry and Reproduction of *Varanus Olivaceus* Hallowell (Sauria: Varanidae) at the Aylon Montalban Zoological Park." *Biawak* 6 (1): 39–53.
- Zacariotti, Rogerio Loesch, and Rodrigo del Rio do Valle. 2010. "Observation of Mating in the Calico Snake *Oxyrhopus Petola* Linnaeus, 1758." *Herpetology Notes* 3: 139–40.
- Zarza, H., G. Ceballos, and M.A. Steele. 2003. "Marmosa Canescens." *Mammalian Species* 7: 1–4.
- Ziegler, Thomas, Norbert Rutz, Johannes Oberreuter, and Simone Holst. 2010. "First F2 Breeding of Hte Quince Monitor Lizard *Varanus Melinus* Bohme & Ziegler, 1997, at the Cologne Zoo Aquarium." *Biawak* 4 (2): 82–92.
- Ziegler, Thomas, Melanie Strauch, Tomas Pes, Jan Konas, Tomas Jirasek, Norbert Rutz, Johannes Oberreuter, and Simone Holst. 2009. "First Captive Breeding of the Blue Tree Monitor *Varanus Macraei* Bohme & Jacobs, 2001, at the Plzen and Cologne Zoos." *Biawak* 3 (4): 122–33.
- Ziembicki, Mark. 2009. "Ecology and Movements of the Australian Bustard *Ardeotis Australis* in a Dynamic Landscape". University of Adelaide.
- Ziesemann, Birgit, Dianne H. Brunton, and Isabel C. Castro. 2011. "Nesting Success and Breeding Ecology in a High-Density Population of Brown Kiwi (*Apteryx Mantelli*)." *Emu* 111 (2). CSIRO PUBLISHING: 148.
- Zortéa, M. 2003. "Reproductive Patterns and Feeding Habits of Three Nectarivorous Bats (Phyllostomidae: Glossophaginae) from the Brazilian Cerrado." *Brazilian Journal of Biology* 63 (1). Instituto Internacional de Ecologia: 159–68.
- Zug, George R. 2013. *Reptiles and Amphibians of the Pacific Islands: A Comprehensive Guide*. University of California Press.
